# Supplementary material for: Gene-informed decomposition model predicts lower soil carbon loss due to persistent microbial adaptation to warming
Source: PubMed Central journal article supplement (PMC7524716; doi:10.1038/s41467-020-18706-z), 2020-09-29
Supplement: 41467_2020_18706_MOESM1_ESM.pdf [file 41467_2020_18706_MOESM1_ESM.pdf]

## **Supplementary Information**

**Gene-informed decomposition model predicts lower soil carbon loss due to persistent microbial adaptation to warming**

**Guo et al.**

**Includes**

**Supplementary Tables (1-11)**

**Supplementary Figures (1-16)**

**Supplementary Table 1.** Summary of sequence and GeoChip statistics. The microbial samples from each year were analyzed with various molecular approaches.

| Sequencing/<br>GeoChip                  | Targets               | Numbers of<br>samples<br>analyzed | Total base<br>pairs (bp) | Average No. of<br>reads/probes per<br>sample | OTUs/<br>genes |
|-----------------------------------------|-----------------------|-----------------------------------|--------------------------|----------------------------------------------|----------------|
| 16S rRNA gene<br>amplicon<br>sequencing | Bacteria +<br>archaea | 56                                | 0.74G                    | 51,415±2,696                                 | 26,158         |
| ITS amplicon<br>sequencing              | Fungi                 | 56                                | 0.43G                    | 3,1203±4,017                                 | 5,336          |
| Shotgun<br>sequencing                   | Functional<br>genes   | 56                                | 0.96T                    | 127.83±2.89M                                 | 98,682         |
| GeoChip                                 | Functional<br>genes   | 56                                | NA                       | 35,425±468                                   | 35,425         |

**Supplementary Table 2.** The correlations between the structure of each functional gene group involved soil C decomposition and N cycling processes and each environmental attribute revealed by CCA analysis. Significance is adjusted by false discovery rate (FDR) and the p values are shown here.

| Attributes <sup>+</sup> |                           | GeoChip        |                |                 | Metagenome based<br>EcoFUN-MAP |                |                 | Metagenomic<br>sequencing |                |                 |
|-------------------------|---------------------------|----------------|----------------|-----------------|--------------------------------|----------------|-----------------|---------------------------|----------------|-----------------|
|                         |                           | R <sub>h</sub> | R <sub>t</sub> | Q <sub>10</sub> | R <sub>h</sub>                 | R <sub>t</sub> | Q <sub>10</sub> | R <sub>h</sub>            | R <sub>t</sub> | Q <sub>10</sub> |
|                         | Carbon cycling            | <0.01          | <0.01          | 0.05            | 0.02                           | <0.01          | 0.07            | 0.08                      | <0.01          | 0.02            |
|                         | Carbon degradation        | <0.01          | <0.01          | 0.03            | 0.10                           | <0.01          | 0.10            | 0.04                      | 0.07           | 0.03            |
| <b>C degradation</b>    | Starch                    | <0.01          | <0.01          | 0.02            | 0.20                           | 0.04           | 0.51            | 0.02                      | 0.09           | 0.30            |
|                         | Pectin                    | <0.01          | <0.01          | 0.03            | 0.90                           | 0.97           | 0.67            | 0.40                      | 0.47           | 0.01            |
|                         | Hemicellulose             | <0.01          | 0.02           | 0.31            | 0.27                           | 0.02           | 0.12            | 0.18                      | 0.07           | 0.02            |
|                         | Cellulose                 | <0.01          | <0.01          | 0.02            | 0.38                           | 0.13           | 0.24            | 0.09                      | 0.09           | 0.47            |
|                         | Chitin                    | <0.01          | <0.01          | 0.03            | 0.67                           | 0.09           | 0.36            | <0.01                     | 0.07           | 0.80            |
|                         | Other                     | <0.01          | <0.01          | 0.03            | 0.03                           | <0.01          | 0.08            | 0.08                      | 0.03           | 0.07            |
|                         | Vanillin/lignin           | <0.01          | <0.01          | 0.02            | 0.09                           | 0.07           | <0.01           | 0.30                      | 0.04           | 0.01            |
| <b>N cycling</b>        | Ammonification            | <0.01          | <0.01          | 0.03            | 0.02                           | <0.01          | 0.04            | <0.01                     | <0.01          | 0.03            |
|                         | Anammox                   | 0.12           | 0.60           | 0.96            | 0.85                           | 0.84           | 0.85            | <0.01                     | <0.01          | 0.18            |
|                         | Assimilatory N reduction  | <0.01          | <0.01          | 0.03            | 0.10                           | <0.01          | 0.01            | 0.30                      | <0.01          | 0.02            |
|                         | Denitrification           | <0.01          | 0.03           | 0.28            | 0.33                           | 0.36           | 0.44            | 0.26                      | 0.04           | 0.12            |
|                         | Dissimilatory N reduction | 0.22           | 0.08           | 0.09            | 0.48                           | 0.03           | 0.49            | 0.71                      | 0.59           | 0.02            |
|                         | Nitrification             | <0.01          | <0.01          | 0.01            | 0.52                           | 0.52           | 0.50            | <0.01                     | <0.01          | 0.18            |
|                         | Nitrogen fixation         | <0.01          | <0.01          | 0.02            | 0.37                           | 0.62           | 0.91            | 0.43                      | 0.39           | 0.16            |
| <b>P utilization</b>    | P utilization             | <0.01          | <0.01          | 0.03            | 0.04                           | 0.01           | 0.03            | <0.01                     | <0.01          | 0.04            |
| <b>S metabolism</b>     | Adenylylsulfate reductase | <0.01          | <0.01          | 0.06            | 0.33                           | 0.36           | 0.44            | 0.83                      | 0.01           | 0.05            |
|                         | Sulfur assimilation       | <0.01          | <0.01          | 0.05            | <0.01                          | <0.01          | 0.18            | 0.76                      | 0.13           | 0.34            |
|                         | Sulfite reduction         | <0.01          | <0.01          | <0.01           | 0.48                           | 0.11           | 0.81            | 0.01                      | <0.01          | <0.01           |
|                         | Sulfide oxidation         | <0.01          | <0.01          | 0.05            | 0.02                           | <0.01          | 0.42            | 0.73                      | 0.12           | 0.43            |

<sup>+</sup> Abbreviation of environmental attributes: R<sub>h</sub>, heterotrophic respiration; R<sub>t</sub>, soil total respiration; Q<sub>10</sub>, temperature sensitivity of heterotrophic respiration.

**Supplementary Table 3.** The correlations between the structure of each functional gene group involved soil C decomposition and N cycling processes and each environmental attribute revealed by Mantel test. Significance is adjusted by false discovery rate (FDR) and the p values are shown here.

| Attributes <sup>+</sup> | GeoChip                   |                |                 | Metagenome based<br>EcoFUN-MAP |                |                 | Metagenomic<br>sequencing |                |                 |       |
|-------------------------|---------------------------|----------------|-----------------|--------------------------------|----------------|-----------------|---------------------------|----------------|-----------------|-------|
|                         | R <sub>h</sub>            | R <sub>t</sub> | Q <sub>10</sub> | R <sub>h</sub>                 | R <sub>t</sub> | Q <sub>10</sub> | R <sub>h</sub>            | R <sub>t</sub> | Q <sub>10</sub> |       |
| Carbon cycling          | 0.01                      | <0.01          | 0.01            | 0.23                           | 0.08           | 0.42            | 0.01                      | 0.04           | 0.1             |       |
| Carbon degradation      | <0.01                     | <0.01          | 0.01            | 0.13                           | 0.01           | 0.16            | 0.01                      | 0.07           | 0.1             |       |
| <b>C degradation</b>    | Starch                    | <0.01          | <0.01           | 0.01                           | 0.04           | <0.01           | 0.27                      | 0.05           | 0.07            | 0.46  |
|                         | Pectin                    | 0.02           | <0.01           | 0.02                           | 0.06           | <0.01           | 0.03                      | 0.73           | 0.16            | 0.11  |
|                         | Hemicellulose             | <0.01          | <0.01           | 0.03                           | 0.07           | 0.02            | 0.07                      | 0.03           | 0.02            | 0.14  |
|                         | Cellulose                 | <0.01          | <0.01           | 0.02                           | 0.16           | 0.03            | 0.05                      | 0.16           | 0.19            | 0.12  |
|                         | Chitin                    | <0.01          | <0.01           | 0.01                           | 0.38           | <0.01           | 0.34                      | 0.28           | 0.02            | 0.23  |
|                         | Other                     | <0.01          | <0.01           | 0.01                           | 0.29           | 0.12            | 0.36                      | 0.08           | 0.04            | 0.06  |
|                         | Vanillin/lignin           | <0.01          | <0.01           | 0.01                           | 0.15           | 0.04            | 0.12                      | 0.28           | 0.47            | 0.3   |
| <b>N cycling</b>        | Ammonification            | 0.04           | <0.01           | 0.01                           | 0.11           | 0.12            | 0.29                      | 0.03           | 0.02            | <0.01 |
|                         | Anammox                   | 0.15           | 0.73            | 0.72                           | 0.38           | 0.67            | 0.74                      | 0.01           | <0.01           | 0.06  |
|                         | Assimilatory N reduction  | 0.01           | <0.01           | 0.01                           | 0.18           | <0.01           | 0.07                      | 0.01           | 0.01            | 0.1   |
|                         | Denitrification           | <0.01          | <0.01           | 0.01                           | 0.37           | 0.37            | 0.14                      | 0.21           | 0.26            | 0.65  |
|                         | Dissimilatory N reduction | 0.17           | 0.04            | 0.03                           | 0.38           | 0.03            | 0.77                      | 0.15           | 0.79            | 0.69  |
|                         | Nitrification             | 0.11           | 0.01            | 0.01                           | 0.86           | 0.66            | 0.29                      | <0.01          | <0.01           | 0.06  |
|                         | Nitrogen fixation         | <0.01          | <0.01           | <0.01                          | 0.76           | 0.7             | 0.53                      | 0.32           | 0.12            | 0.01  |
| <b>P utilization</b>    | P utilization             | <0.01          | <0.01           | 0.01                           | 0.22           | 0.06            | 0.21                      | 0.01           | 0.01            | 0.19  |
| <b>S metabolism</b>     | Adenylylsulfate reductase | <0.01          | <0.01           | 0.01                           | 0.94           | 0.99            | 0.95                      | 0.44           | 0.21            | 0.43  |
|                         | Sulfur assimilation       | 0.16           | 0.01            | 0.06                           | 0.05           | 0.16            | 0.49                      | 0.49           | <0.01           | 0.54  |
|                         | Sulfite reduction         | <0.01          | <0.01           | <0.01                          | 0.53           | 0.08            | 0.96                      | 0.45           | 0.71            | <0.01 |
|                         | Sulfide oxidation         | <0.01          | <0.01           | 0.01                           | 0.16           | 0.2             | 0.06                      | 0.43           | 0.25            | 0.45  |

<sup>+</sup> Abbreviation of environmental attributes: R<sub>h</sub>, heterotrophic respiration; R<sub>t</sub>, soil total respiration; Q<sub>10</sub>, temperature sensitivity of heterotrophic respiration.

**Supplementary Table 4.** The enzyme/protein encoded by biogeochemical cycling genes shown in Fig. 2, Supplementary Figures 9 and 10, and Supplementary Tables 2 and 3.

| Gene category   | Subcategory      | Gene name             | Enzyme/protein encoded         |
|-----------------|------------------|-----------------------|--------------------------------|
| C degradation   | Glyoxylate cycle | <i>AceA</i>           | Isocitrate lyase               |
|                 | Glyoxylate cycle | <i>AceB</i>           | Malate synthase A              |
|                 | Starch           | glucoamylase          | Glucoamylase                   |
|                 | Starch           | <i>cda</i>            | Cyclomaltodextrinase           |
|                 | Starch           | <i>amyA</i>           | Alpha-amylase                  |
|                 | Starch           | <i>amyX</i>           | Pullulanase                    |
|                 | Starch           | <i>nplT</i>           | Neopullulanase                 |
|                 | Starch           | <i>apu</i>            | Amylopullulanase               |
|                 | Starch           | isopullulanase        | Isopullulanase                 |
|                 | Starch           | <i>pula</i>           | Pullulanase, extracellular     |
|                 | Hemicellulose    | xylanase              | Xylanase                       |
|                 | Hemicellulose    | mannanase             | Beta-mannanase                 |
|                 | Hemicellulose    | <i>xyla</i>           | Xylose isomerase               |
|                 | Hemicellulose    | <i>ara</i>            | Arabinofuranosidase            |
|                 | Pectin           | pectinase             | Pectinase                      |
|                 | Pectin           | pectin lyase          | Pectin lyase                   |
|                 | Pectin           | <i>Pg</i>             | Polygalacturonase              |
|                 | Pectin           | <i>pel_Cdeg</i>       | Pectin lyase                   |
|                 | Pectin           | <i>rgh</i>            | Rhamnogalacturonase            |
|                 | Pectin           | <i>pme</i>            | Pectinesterase                 |
|                 | Pectin           | exopolygalacturonase  | Exopolygalacturonase           |
|                 | Pectin           | <i>RgaE</i>           | Lipolytic enzyme               |
|                 | Pectin           | <i>rgl</i>            | Polysaccharide lyase           |
|                 | Pectin           | pectate lyase         | Pectate lyase                  |
|                 | Pectin           | endopolygalacturonase | Endopolygalacturonase          |
|                 | Cellulose        | <i>axe</i>            | Acetyl xylan esterase          |
|                 | Cellulose        | cellobiase            | Cellobiase                     |
|                 | Cellulose        | endoglucanase         | Endoglucanase                  |
|                 | Cellulose        | cellulase             | Cellulase                      |
|                 | Cellulose        | exoglucanase          | Exoglucanase                   |
|                 | Camphor          | camdcab               | Camphor 5-monooxygenase        |
|                 | Terpenes         | <i>limeh</i>          | Limonene-1,2-epoxide hydrolase |
|                 | Terpenes         | <i>lmo</i>            | Limonene 1,2-monooxygenase     |
|                 | Terpenes         | <i>cdh</i>            | Carveol dehydrogenase          |
|                 | Cutin            | cutinase              | Cutinase                       |
|                 | Chitin           | acetylglucosaminidase | Acetylglucosaminidase          |
|                 | Chitin           | chitin deacetylase    | Chitin deacetylase             |
|                 | Chitin           | chitinase             | Chitinase                      |
|                 | Vanillin/Lignin  | <i>vana</i>           | Vanillate monooxygenase        |
|                 | Vanillin/Lignin  | <i>vdh</i>            | Vanillin dehydrogenase         |
|                 | Vanillin/Lignin  | phenol oxidase        | Phenol oxidase                 |
|                 | Vanillin/Lignin  | ligninase             | Ligninase                      |
| Vanillin/Lignin | <i>glx</i>       | Glyoxal oxidase       |                                |

|                   |                                    |                                 |                                           |
|-------------------|------------------------------------|---------------------------------|-------------------------------------------|
|                   | Vanillin/Lignin                    | <i>mnp</i>                      | Manganese peroxidase                      |
| C fixation        | Bacterial Microcompartments        | <i>CsoS2</i>                    | Carboxysome                               |
|                   | Calvin cycle                       | <i>rubisco</i>                  | RuBisCo                                   |
|                   | Calvin cycle                       | FBPase                          | Fructose-1 6-bisphosphatase               |
|                   | Calvin cycle                       | <i>PRK</i>                      | Phosphoribulokinase                       |
|                   | Reductive acetyl CCoA              | <i>codh</i>                     | Carbon monoxide dehydrogenase             |
|                   | Reductive acetyl CCoA              | <i>fthfs</i>                    | Tetrahydrofolate formylase                |
|                   | Multiple systems                   | <i>pcc</i>                      | Propionyl-CoA carboxylase                 |
|                   | reductive tricarboxylic acid cycle | <i>aclb</i>                     | ATP citrate lyase                         |
|                   | reductive tricarboxylic acid cycle | <i>mdh</i>                      | Malate dehydrogenase                      |
| N cycling         | Ammonification                     | <i>gdh</i>                      | Glutamate dehydrogenase                   |
|                   | Ammonification                     | <i>urec</i>                     | Urease                                    |
|                   | Anammox                            | <i>hzsa</i>                     | Hydrazine synthase                        |
|                   | Anammox                            | <i>hzo</i>                      | Hydrazine oxidoreductase                  |
|                   | Assimilatory N reduction           | <i>narb</i>                     | Nitrate reductase                         |
|                   | Assimilatory N reduction           | <i>NiR</i>                      | Nitrite reductase                         |
|                   | Assimilatory N reduction           | <i>nira</i>                     | Ferredoxin-nitrite reductase              |
|                   | Assimilatory N reduction           | <i>nirb</i>                     | Nitrite reductase                         |
|                   | Assimilatory N reduction           | <i>nasa</i>                     | Assimilatory nitrate reductase            |
|                   | Denitrification                    | <i>norb</i>                     | Nitric-oxide reductase                    |
|                   | Denitrification                    | <i>nirk</i>                     | Copper containing nitrite reductase       |
|                   | Denitrification                    | <i>nirs</i>                     | Cytochrome cd1 nitrite reductase          |
|                   | Denitrification                    | <i>cnorB</i>                    | Nitric oxide reductase                    |
|                   | Denitrification                    | <i>nosz</i>                     | Nitrous oxide reductase                   |
|                   | Denitrification                    | <i>narg</i>                     | Respiratory nitrate reductase             |
|                   | Dissimilatory N reduction          | <i>nrfa</i>                     | Ammonia-forming nitrate reductase         |
|                   | Dissimilatory N reduction          | <i>napa</i>                     | Periplasmic nitrate reductase             |
|                   | Nitrification                      | <i>amoA</i>                     | Ammonia monooxygenase                     |
| Nitrification     | <i>hao</i>                         | Hydroxylamine oxidoreductase    |                                           |
| Nitrogen fixation | <i>nifh</i>                        | Dinitrogenase                   |                                           |
| P utilization     | Phosphorus utilization             | phytase                         | Phytase                                   |
|                   | Phosphorus utilization             | <i>ppx</i>                      | Exopolyphosphatase                        |
|                   | Phosphorus utilization             | <i>ppk</i>                      | Polyphosphate kinase                      |
| S metabolism      | Adenylylsulfate reductase          | <i>APS_AprA</i>                 | Adenylylsulfate reductase                 |
|                   | Adenylylsulfate reductase          | <i>AprA</i>                     | Adenylylsulfate reductase                 |
|                   | Adenylylsulfate reductase          | <i>APS_AprB</i>                 | Adenylylsulfate reductase                 |
|                   | Sulfur assimilation                | cysteine_synthase               | Cysteine synthase                         |
|                   | Sulfur assimilation                | ATP_sulphurylase                | ATP sulphurylase                          |
|                   | Sulfur assimilation                | PAPS_reductase                  | Phosphoadenosine phosphosulfate reductase |
|                   | Sulfite reduction                  | <i>cysI</i>                     | Sulfite reductase                         |
|                   | Sulfite reduction                  | <i>cysJ</i>                     | Sulfite reductase                         |
|                   | Sulfide oxidation                  | <i>sqr</i>                      | Sulfide-quinone reductase                 |
|                   | sulfite reduction                  | <i>dsrb</i>                     | Dissimilatory sulfite reductase           |
|                   | sulfite reduction                  | <i>Sir</i>                      | Sulfite reductase                         |
| sulfite reduction | <i>dsra</i>                        | Dissimilatory sulfite reductase |                                           |
| Sulfur Oxidation  | <i>sox</i>                         | Sulfur oxidation cycle enzymes  |                                           |

**Supplementary Table 5.** Response functions of soil pH, temperature and moisture in MEND model.

| Function description                                                                                            | Equation                                                                                                                                                                                                                                                                                         | Eq#   |
|-----------------------------------------------------------------------------------------------------------------|--------------------------------------------------------------------------------------------------------------------------------------------------------------------------------------------------------------------------------------------------------------------------------------------------|-------|
| Reaction rate ( $v$ ) at a specific soil water potential ( $\psi$ ), soil temperature ( $T$ ), and soil pH (pH) | $v = v_0 \cdot f(\psi) \cdot f(T) \cdot f(pH)$                                                                                                                                                                                                                                                   | (E1)  |
| Response function of soil pH                                                                                    | $f(pH) = \exp \left[ - \left( \frac{pH - pH_{opt}}{pH_{sen}} \right)^2 \right]$                                                                                                                                                                                                                  | (E2)  |
| Temperature sensitivity of carbon use efficiency ( $Y_g$ )                                                      | $Y_g(T) = Y_g(T_{ref}) - k_{Yg} \cdot (T - T_{ref})$                                                                                                                                                                                                                                             | (E3)  |
| Arrhenius equation or $Q_{10}$ method to simulate the response of other parameters to changes in temperature    | $f(T) = \exp \left[ - \frac{Ea}{R} \left( \frac{1}{T} - \frac{1}{T_{ref}} \right) \right]$                                                                                                                                                                                                       | (E4)  |
|                                                                                                                 | $f(T) = Q_{10}^{\frac{T - T_{ref}}{10}}$                                                                                                                                                                                                                                                         | (E5)  |
|                                                                                                                 | $Q_{10} = \exp \left[ \frac{Ea}{R \cdot T_{ref}} \cdot \frac{10}{T} \right]$                                                                                                                                                                                                                     | (E6)  |
| Soil moisture response function for SOM decomposition by oxidative enzymes                                      | $f_{lig}(\psi) = \begin{cases} 0, & \psi \leq -10^{2.5} \\ 0.625 - 0.25 \times \log_{10}(-\psi), & -10^{2.5} < \psi \leq -10^{1.5} \\ 1, & -10^{1.5} < \psi \leq -10^{-2.5} \\ [2.5 + 0.4 \times \log_{10}(-\psi)]/1.5, & -10^{-2.5} < \psi \leq -10^{-4} \\ 0.6, & \psi > -10^{-4} \end{cases}$ | (E7)  |
| Soil moisture response function for SOM decomposition by hydrolytic enzymes                                     | $f_{cel}(\psi) = \begin{cases} 0, & \psi \leq \psi_{min} \\ 1 - \left[ \frac{\ln(\psi/\psi_{FC})}{\ln(\psi_{min}/\psi_{FC})} \right]^b, & \psi_{min} < \psi \leq \psi_{FC} \\ 1, & \psi > \psi_{FC} \end{cases}$                                                                                 | (E8)  |
| Soil moisture response function for microbial mortality, dormancy & resuscitation                               | $f_{A2D}(\psi) = \frac{(-\psi)^\omega}{(-\psi)^\omega + (-\psi_{A2D})^\omega}$                                                                                                                                                                                                                   | (E9)  |
|                                                                                                                 | $f_{D2A}(\psi) = \frac{(-\psi_{D2A})^\omega}{(-\psi)^\omega + (-\psi_{D2A})^\omega}$                                                                                                                                                                                                             | (E10) |

**Supplementary Table 6.** Soil carbon pools (state variables) in the MEND model.

| Soil carbon pool                                            | Abbreviation     | Variable name in governing equations |
|-------------------------------------------------------------|------------------|--------------------------------------|
| Particulate organic matter decomposed by oxidative enzymes  | POM <sub>1</sub> | $P_1$                                |
| Particulate organic matter decomposed by hydrolytic enzymes | POM <sub>2</sub> | $P_2$                                |
| Mineral-associated organic matter                           | MOM              | $M$                                  |
| Dissolved organic matter                                    | DOM              | $D$                                  |
| Active MOM interacting with DOM                             | QOM              | $Q$                                  |
| Active microbial biomass                                    | MBA              | BA                                   |
| Dormant microbial biomass                                   | MBD              | BD                                   |
| Oxidative enzymes decomposing POM <sub>1</sub>              | EP <sub>1</sub>  | EP <sub>1</sub>                      |
| Hydrolytic enzymes decomposing POM <sub>2</sub>             | EP <sub>2</sub>  | EP <sub>2</sub>                      |
| Enzymes decomposing MOM                                     | EM               | EM                                   |



**Supplementary Table 7.** Governing equations of each soil carbon pool in the MEND model

| Governing Equation                                                                                                          | Eq#   |
|-----------------------------------------------------------------------------------------------------------------------------|-------|
| $\frac{dP_1}{dt} = I_{P_1} + (1 - g_D) \cdot F_{12} - F_1$                                                                  | (S1)  |
| $\frac{dP_2}{dt} = I_{P_2} - F_2$                                                                                           | (S2)  |
| $\frac{dM}{dt} = (1 - f_D) \cdot (F_1 + F_2) - F_3$                                                                         | (S3)  |
| $\frac{dQ}{dt} = F_4 - F_5$                                                                                                 | (S4)  |
| $\frac{dD}{dt} = I_D + f_D(F_1 + F_2) + g_D \cdot F_{12} + F_3 + (F_{14,EP1} + F_{14,EP2} + F_{14,EM}) - F_6 - (F_4 - F_5)$ | (S5)  |
| $\frac{dBA}{dt} = F_6 - (F_7 - F_8) - (F_9 + F_{10}) - F_{12} - (F_{13,EP1} + F_{13,EP2} + F_{13,EM})$                      | (S6)  |
| $\frac{dBD}{dt} = (F_7 - F_8) - F_{11}$                                                                                     | (S7)  |
| $\frac{dEP_1}{dt} = F_{13,EP1} - F_{14,EP1}$                                                                                | (S8)  |
| $\frac{dEP_2}{dt} = F_{13,EP2} - F_{14,EP2}$                                                                                | (S9)  |
| $\frac{dEM}{dt} = F_{13,EM} - F_{14,EM}$                                                                                    | (S10) |
| $\frac{dCO_2}{dt} = (F_9 + F_{10}) + F_{11}$                                                                                | (S11) |
| $\frac{d}{dt}(P_1 + P_2 + M + Q + D + BA + BD + EP_1 + EP_2 + EM) = I_{P_1} + I_{P_2} + I_D - (F_9 + F_{10} + F_{11})$      | (S12) |

The state variables (C pools) are described in Table S6; Eq. S11 indicates the total heterotrophic respiration flux and Eq. S12 expresses the overall mass balance of the system. The transformation fluxes are elucidated by Eqs. S13–S26 in Table S8.

**Supplementary Table 8.** Component fluxes in the MEND model (parameters are described in Table S9)

| Flux description                                                                                                                                  | Equation                                                                                                                                                                        | Eq#            |
|---------------------------------------------------------------------------------------------------------------------------------------------------|---------------------------------------------------------------------------------------------------------------------------------------------------------------------------------|----------------|
| Particulate organic carbon (POC) pool 1 ( $P_1$ ) decomposition ( $F_1$ )                                                                         | $F_1 = \frac{Vd_{P1} \cdot EP_1 \cdot P_1}{K_{P1} + P_1}$                                                                                                                       | (S13)          |
| POC pool 2 ( $P_2$ ) decomposition                                                                                                                | $F_2 = \frac{Vd_{P2} \cdot EP_2 \cdot P_2}{K_{P2} + P_2}$                                                                                                                       | (S14)          |
| Mineral-associated organic carbon (MOC, $M$ ) decomposition                                                                                       | $F_3 = \frac{Vd_M \cdot EM \cdot M}{K_M + M}$                                                                                                                                   | (S15)          |
| Adsorption ( $F_4$ ) and desorption ( $F_5$ ) between dissolved organic carbon (DOC, $D$ ) and adsorbed DOC (QOC, $Q$ )                           | $F_4 = k_{ads} \cdot (1 - Q/Q_{max}) \cdot D$<br>$F_5 = k_{des} \cdot (Q/Q_{max})$                                                                                              | (S16)<br>(S17) |
| DOC ( $D$ ) uptake by microbes                                                                                                                    | $F_6 = \frac{1}{Y_g} (V_g + V_m) \frac{D \cdot BA}{K_D + D}$                                                                                                                    | (S18)          |
| Dormancy ( $F_7$ ) and reactivation ( $F_8$ ) between active (MBA) and dormant (MBD) microbial biomass (BA and BD)                                | $F_7 = [1 - D/(K_D + D)] \cdot V_m \cdot BA$<br>$F_8 = D/(K_D + D) \cdot V_m \cdot BD$                                                                                          | (S19)<br>(S20) |
| MBA (BA) growth respiration ( $F_9$ ) and maintenance respiration ( $F_{10}$ )                                                                    | $F_9 = \left( \frac{1}{Y_g} - 1 \right) \frac{V_g \cdot BA \cdot D}{K_D + D}$<br>$F_{10} = \left( \frac{1}{Y_g} - 1 \right) \frac{V_m \cdot BA \cdot D}{K_D + D}$               | (S21)<br>(S22) |
| MBD (BD) maintenance respiration                                                                                                                  | $F_{11} = \beta \cdot V_m \cdot BD$                                                                                                                                             | (S23)          |
| MBA (BA) mortality                                                                                                                                | $F_{12} = \gamma \cdot V_m \cdot BA$                                                                                                                                            | (S24)          |
| Synthesis of enzymes for $P_1$ ( $EP_1$ , $F_{13,EP1}$ ), enzymes for $P_2$ ( $EP_2$ , $F_{13,EP2}$ ), and enzymes for $M$ ( $EM$ , $F_{13,EM}$ ) | $F_{13,EP1} = P_1 / (P_1 + P_2) \cdot p_{EP} \cdot V_m \cdot BA$<br>$F_{13,EP2} = P_2 / (P_1 + P_2) \cdot p_{EP} \cdot V_m \cdot BA$<br>$F_{13,EM} = p_{EM} \cdot V_m \cdot BA$ | (S25)          |
| Turnover of enzymes ( $EP_1$ , $EP_2$ , $EM$ )                                                                                                    | $F_{14,EP1} = r_E \cdot EP_1$<br>$F_{14,EP2} = r_E \cdot EP_2$<br>$F_{14,EM} = r_E \cdot EM$                                                                                    | (S26)          |

Notes: Italic symbols like  $F_i$  represent component fluxes in equations. Italic symbols  $P_1$ ,  $P_2$ ,  $M$ ,  $Q$ ,  $D$ ,  $BA$ ,  $BD$ ,  $EP_1$ ,  $EP_2$ , and  $EM$  are state variables (soil carbon pools, see Supplementary Table 6) in equations.

**Supplementary Table 9.** Microbial-ENzyme Decomposition (MEND) model parameters

| ID | Parameter      | Description                                                                                                                            | Units                                      | Eq# |
|----|----------------|----------------------------------------------------------------------------------------------------------------------------------------|--------------------------------------------|-----|
| 1  | $LF_0$         | Initial fraction of $P_1$ , $LF_0 = P_1/(P_1+P_2)$                                                                                     | —                                          |     |
| 2  | $r_0$          | Initial active fraction of microbes, $r_0 = BA/(BA+BD)$                                                                                | —                                          |     |
| 3  | fINP           | Scaling factor for litter input rate                                                                                                   | —                                          |     |
| 4  | $Vd_{P1}$      | Maximum specific decomposition rate for $P_1$                                                                                          | mg C mg <sup>-1</sup> C h <sup>-1</sup>    | S13 |
| 5  | $Vd_{P2}$      | Maximum specific decomposition rate for $P_2$                                                                                          | mg C mg <sup>-1</sup> C h <sup>-1</sup>    | S14 |
| 6  | $Vd_M$         | Maximum specific decomposition rate for $M$                                                                                            | mg C mg <sup>-1</sup> C h <sup>-1</sup>    | S15 |
| 7  | $K_{P1}$       | Half-saturation constant for $P_1$ decomposition                                                                                       | mg C cm <sup>-3</sup> soil                 | S13 |
| 8  | $K_{P2}$       | Half-saturation constant for $P_2$ decomposition                                                                                       | mg C cm <sup>-3</sup> soil                 | S14 |
| 9  | $K_M$          | Half-saturation constant for $M$ decomposition                                                                                         | mg C cm <sup>-3</sup> soil                 | S15 |
| 10 | $Q_{max}$      | Maximum sorption capacity                                                                                                              | mg C cm <sup>-3</sup> soil                 | S16 |
| 11 | $K_{ba}$       | Binding affinity, Sorption rate $k_{ads} = k_{des} \times K_{ba}$                                                                      | (mg C cm <sup>-3</sup> soil) <sup>-1</sup> | S16 |
| 12 | $k_{des}$      | Desorption rate                                                                                                                        | mg C cm <sup>-3</sup> soil h <sup>-1</sup> | S17 |
| 13 | $r_E$          | Turnover rate of EP <sub>1</sub> , EP <sub>2</sub> , and EM                                                                            | mg C mg <sup>-1</sup> C h <sup>-1</sup>    | S26 |
| 14 | $p_{EP}$       | $[V_m \times p_{EP}]$ is the production rate of EP (EP <sub>1</sub> + EP <sub>2</sub> ), $V_m$ is the specific maintenance rate for BA | —                                          | S25 |
| 15 | $fp_{EM}$      | $fp_{EM} = p_{EM}/p_{EP}$ , $[V_{mt} \times p_{EM}]$ is the production rate of EM                                                      | —                                          | S25 |
| 16 | $f_D$          | Fraction of decomposed $P_1$ and $P_2$ allocated to $D$                                                                                | —                                          | S3  |
| 17 | $g_D$          | Fraction of dead BA allocated to $D$                                                                                                   | —                                          | S1  |
| 18 | $V_g$          | Maximum specific uptake rate of $D$ for growth                                                                                         | mg C mg <sup>-1</sup> C h <sup>-1</sup>    | S21 |
| 19 | $\alpha$       | $= V_m / (V_g + V_m)$                                                                                                                  | —                                          | S22 |
| 20 | $K_D$          | Half-saturation constant for microbial uptake of $D$                                                                                   | mg C cm <sup>-3</sup> soil                 | S18 |
| 21 | $Y_g(T_{ref})$ | Intrinsic carbon use efficiency at reference temperature ( $T_{ref}$ )                                                                 | —                                          | S28 |
| 22 | $k_{Yg}$       | Slope for $Y_g$ dependence of temperature                                                                                              | 1/°C                                       | S28 |
| 23 | $Q_{10}$       | $Q_{10}$ for temperature response function                                                                                             | —                                          | S28 |
| 24 | $\gamma$       | Max microbial mortality rate $= V_m \times \gamma$                                                                                     | —                                          | S24 |
| 25 | $\beta$        | Ratio of dormant maintenance rate to $V_m$                                                                                             | —                                          | S23 |
| 26 | $\psi_{A2D}$   | Soil water potential (SWP) threshold for microbial dormancy; both $\psi_{A2D}$ & $\psi_{D2A} < 0$                                      | -MPa                                       | S30 |
| 27 | $\tau$         | $\psi_{D2A} = \psi_{A2D} \times \tau$ , $\psi_{D2A}$ is the SWP threshold for microbial resuscitation                                  | —                                          | S30 |
| 28 | $\omega$       | Exponential in SWP function for microbial dormancy or resuscitation                                                                    | —                                          | S30 |

Notes: The column “Eq#” lists the major equation # (see Supplementary Table 7 and 8) in which each parameter is used.

**Supplementary Table 10.** Objective functions used for different response variables in the MEND model parameterization.

| Response Variable | Description of Response Variable      | Objective Function for Each Response Variable                                                                             |                                                                                                 |
|-------------------|---------------------------------------|---------------------------------------------------------------------------------------------------------------------------|-------------------------------------------------------------------------------------------------|
|                   |                                       | Control                                                                                                                   | Warming                                                                                         |
| R <sub>h</sub>    | Heterotrophic Respiration             | R <sup>2</sup> between Simulated R <sub>h</sub> and Observed R <sub>h</sub>                                               | R <sup>2</sup> between Simulated R <sub>h</sub> and Observed R <sub>h</sub>                     |
| MBC               | Microbial Biomass Carbon              | MARE < 20%<br>MBC <sub>mean</sub> = 0.025 mg C cm <sup>-3</sup><br>(MBC = 2% SOC)<br>MBC <sub>mean_simulated</sub> = 0.02 | MARE < 5%<br>MBC <sub>mean</sub> = 0.02*0.84 = 0.017 mg C cm <sup>-3</sup>                      |
| EnzCo             | Oxidative Enzyme Concentration (EnzC) | Correlation (r) between Simulated EnzC and Observed gene abundance (DNA concentration × relative abundance)               | MARE between Simulated EnzC and Expected EnzC<br>Expected EnzC = Simulated EnzC at Control × RR |
| EnzCh             | Hydrolytic Enzyme Concentration       | Correlation (r) between Simulated EnzC and Observed gene abundance                                                        | MARE between Simulated EnzC and Expected EnzC                                                   |

Notes: RR is the response ratio of gene abundance under warming to that under control. R<sup>2</sup> denotes the coefficient of determination, MARE is the mean absolute relative error, see Methods Eqs. 3–4.

**Supplementary Table 11.** Activation energy ( $E_a$ :  $\text{kJ mol}^{-1}$ ) and  $Q_{10}$  values\* for cellulases and ligninases

| ID | Category   | Enzyme               | $E_a$ | $Q_{10}$ | Reference                                  |
|----|------------|----------------------|-------|----------|--------------------------------------------|
| 1  | Cellulases | $\beta$ -glucosidase | 30.8  | 1.52     | Eivazi and Tabatabai, 1988 <sup>1</sup>    |
| 2  | Cellulases | $\beta$ -glucosidase | 25.3  | 1.41     | Deng and Tabatabai, 1994 <sup>2</sup>      |
| 3  | Cellulases | $\beta$ -glucosidase | 53.2  | 2.05     | Chauve et al., 2010 <sup>3</sup>           |
| 4  | Cellulases | $\beta$ -glucosidase | 39.0  | 1.70     | Vila-Real et al., 2010 <sup>4</sup>        |
| 5  | Cellulases | $\beta$ -glucosidase | 39.7  | 1.71     | Han and Srinivasan, 1969 <sup>5</sup>      |
| 6  | Cellulases | $\beta$ -glucosidase | 54.3  | 2.09     | Plant et al., 1988 <sup>6</sup>            |
| 7  | Cellulases | $\beta$ -glucosidase | 59.6  | 2.24     | Patchett et al., 1987 <sup>7</sup>         |
| 8  | Cellulases | $\beta$ -glucosidase | 31.0  | 1.52     | Patchett et al., 1987 <sup>7</sup>         |
| 9  | Cellulases | $\beta$ -glucosidase | 41.0  | 1.74     | Patchett et al., 1987 <sup>7</sup>         |
| 10 | Cellulases | $\beta$ -glucosidase | 29.4  | 1.49     | Patchett et al., 1987 <sup>7</sup>         |
| 11 | Cellulases | $\beta$ -glucosidase | 79.5  | 2.93     | Patchett et al., 1987 <sup>7</sup>         |
| 12 | Cellulases | $\beta$ -glucosidase | 44.3  | 1.82     | Ait et al., 1979 <sup>8</sup>              |
| 13 | Cellulases | $\beta$ -glucosidase | 24.7  | 1.40     | McClagherty and Linkins, 1990 <sup>9</sup> |
| 14 | Cellulases | $\beta$ -glucosidase | 61.1  | 2.29     | McClagherty and Linkins, 1990 <sup>9</sup> |
| 15 | Cellulases | $\beta$ -glucosidase | 43.1  | 1.79     | McClagherty and Linkins, 1990 <sup>9</sup> |
| 16 | Cellulases | $\beta$ -glucosidase | 33.2  | 1.57     | McClagherty and Linkins, 1990 <sup>9</sup> |
| 17 | Cellulases | $\beta$ -glucosidase | 41.3  | 1.75     | McClagherty and Linkins, 1990 <sup>9</sup> |
| 18 | Cellulases | $\beta$ -glucosidase | 39.3  | 1.70     | McClagherty and Linkins, 1990 <sup>9</sup> |
| 19 | Cellulases | $\beta$ -glucosidase | 57.0  | 2.16     | Rajoka et al., 2004 <sup>10</sup>          |
| 20 | Cellulases | $\beta$ -glucosidase | 15.0  | 1.23     | Yague and Estevez, 1988 <sup>11</sup>      |
| 21 | Cellulases | $\beta$ -glucosidase | 52.0  | 2.02     | Rajoka et al., 2006 <sup>12</sup>          |
| 22 | Cellulases | $\beta$ -glucosidase | 46.0  | 1.86     | Calsavara et al., 2001 <sup>13</sup>       |
| 23 | Cellulases | $\beta$ -glucosidase | 30.1  | 1.50     | Li et al., 1965 <sup>14</sup>              |
| 24 | Cellulases | Cellobiohydrolase    | 22.2  | 1.35     | Maguire, 1977 <sup>15</sup>                |
| 25 | Cellulases | Cellobiohydrolase    | 79.4  | 2.93     | Saharay et al., 2010 <sup>16</sup>         |
| 26 | Cellulases | Cellobiohydrolase    | 13.8  | 1.21     | Rouau and Odier, 1986 <sup>17</sup>        |
| 27 | Cellulases | Cellobiohydrolase    | 25.9  | 1.42     | Nikolova et al., 1997 <sup>18</sup>        |
| 28 | Cellulases | Cellobiohydrolase    | 17.5  | 1.27     | Banka et al., 1998 <sup>19</sup>           |
| 29 | Cellulases | Cellobiohydrolase    | 52.0  | 2.02     | Eriksen and Goksoyr, 1977 <sup>20</sup>    |
| 30 | Cellulases | Cellobiohydrolase    | 14.7  | 1.22     | Eriksen and Goksoyr, 1977 <sup>20</sup>    |
| 31 | Cellulases | Endo-glucanase       | 26.1  | 1.42     | Eriksen and Goksoyr, 1977 <sup>20</sup>    |
| 32 | Cellulases | Endo-glucanase       | 47.2  | 1.89     | Eriksen and Goksoyr, 1977 <sup>20</sup>    |
| 33 | Cellulases | Endo-glucanase       | 22.8  | 1.36     | Onyike et al., 2008 <sup>21</sup>          |
| 34 | Cellulases | Endo-glucanase       | 45.0  | 1.84     | Petre et al., 1986 <sup>22</sup>           |
| 35 | Cellulases | Endo-glucanase       | 26.9  | 1.44     | Warner et al., 2010 <sup>23</sup>          |
| 36 | Cellulases | Endo-glucanase       | 3.3   | 1.05     | Javed et al., 2008 <sup>24</sup>           |
| 37 | Cellulases | Endo-glucanase       | 51.0  | 1.99     | Saqib et al., 2010 <sup>25</sup>           |
| 38 | Cellulases | Endo-glucanase       | 32.7  | 1.56     | Saqib et al., 2010 <sup>25</sup>           |
| 39 | Cellulases | Endo-glucanase       | 36.2  | 1.63     | Jabbar et al., 2008 <sup>26</sup>          |
| 40 | Cellulases | Endo-glucanase       | 35.5  | 1.62     | Perez-Avalos et al., 2008 <sup>27</sup>    |

|    |            |                       |      |      |                                             |
|----|------------|-----------------------|------|------|---------------------------------------------|
| 41 | Cellulases | Endo-glucanase        | 35.5 | 1.62 | Siddiqui et al., 2000 <sup>28</sup>         |
| 42 | Cellulases | Endo-glucanase        | 38.9 | 1.69 | Melnik et al 1999 <sup>29</sup>             |
| 43 | Cellulases | Endo-glucanase        | 43.9 | 1.81 | McClagherty and Linkins, 1990 <sup>9</sup>  |
| 44 | Cellulases | Endo-glucanase        | 37.6 | 1.66 | McClagherty and Linkins, 1990 <sup>9</sup>  |
| 45 | Cellulases | Endo-glucanase        | 39.1 | 1.70 | McClagherty and Linkins, 1990 <sup>9</sup>  |
| 46 | Cellulases | Endo-glucanase        | 47.7 | 1.91 | McClagherty and Linkins, 1990 <sup>9</sup>  |
| 47 | Cellulases | Endo-glucanase        | 53.6 | 2.07 | McClagherty and Linkins, 1990 <sup>9</sup>  |
| 48 | Cellulases | Endo-glucanase        | 31.7 | 1.54 | McClagherty and Linkins, 1990 <sup>9</sup>  |
| 49 | Cellulases | Endo-glucanase        | 34.0 | 1.58 | McClagherty and Linkins, 1990 <sup>9</sup>  |
| 50 | Cellulases | Endo-glucanase        | 31.3 | 1.53 | McClagherty and Linkins, 1990 <sup>9</sup>  |
| 51 | Cellulases | Endo-glucanase        | 23.0 | 1.37 | Hong et al., 1986 <sup>30</sup>             |
| 52 | Cellulases | Endo-glucanase        | 26.8 | 1.44 | Li et al., 1965 <sup>14</sup>               |
| 53 | Cellulases | Endo-glucanase        | 21.0 | 1.33 | Paljevac et al., 2007 <sup>31</sup>         |
| 79 | Cellulases | Endo-glucanase        | 48.6 | 1.93 | Trasar-Cepeda et al. 2007 <sup>32</sup>     |
| 80 | Cellulases | $\alpha$ -glucosidase | 38.7 | 1.69 | Stone et al. 2012 <sup>33</sup>             |
| 81 | Cellulases | $\beta$ -glucosidase  | 41.5 | 1.75 | Stone et al. 2012 <sup>33</sup>             |
| 82 | Cellulases | $\beta$ -xylosidase   | 46.8 | 1.88 | Stone et al. 2012 <sup>33</sup>             |
| 83 | Cellulases | Cellobiohydrolase     | 52.8 | 2.04 | Stone et al. 2012 <sup>33</sup>             |
| 84 | Cellulases | $\beta$ -glucosidase  | 28.6 | 1.47 | Trasar-Cepeda et al. 2007 <sup>32</sup>     |
| 85 | Cellulases | Exocellulase          | 44.8 | 1.83 | McClagherty & Linkins 1990 <sup>9</sup>     |
| 86 | Cellulases | Endocellulase         | 50.4 | 1.98 | McClagherty & Linkins 1990 <sup>9</sup>     |
| 87 | Cellulases | $\beta$ -glucosidase  | 56.3 | 2.14 | Kahkonen et al. 2001 <sup>34</sup>          |
| 88 | Cellulases | $\beta$ -glucosidase  | 61.8 | 2.31 | Davidson et al. 2012 <sup>35</sup>          |
| 54 | Ligninases | Peroxidase            | 97.5 | 3.74 | Chisari et al., 2007 <sup>36</sup>          |
| 55 | Ligninases | Peroxidase            | 57.8 | 2.19 | Chisari et al., 2007 <sup>36</sup>          |
| 56 | Ligninases | Peroxidase            | 60.0 | 2.25 | Di Nardo et al., 2004 <sup>37</sup>         |
| 57 | Ligninases | Peroxidase            | 86.3 | 3.22 | Chisari et al., 2008 <sup>38</sup>          |
| 58 | Ligninases | Peroxidase            | 66.9 | 2.47 | Padiglia et al., 1995 <sup>39</sup>         |
| 59 | Ligninases | Peroxidase            | 58.5 | 2.21 | Floris et al., 1982 <sup>40</sup>           |
| 60 | Ligninases | Peroxidase            | 17.2 | 1.26 | McClagherty and Linkins, 1990 <sup>9</sup>  |
| 61 | Ligninases | Peroxidase            | 58.5 | 2.21 | McClagherty and Linkins, 1990 <sup>9</sup>  |
| 62 | Ligninases | Peroxidase            | 37.1 | 1.65 | McClagherty and Linkins, 1990 <sup>9</sup>  |
| 63 | Ligninases | Peroxidase            | 33.8 | 1.58 | McClagherty and Linkins, 1990 <sup>9</sup>  |
| 64 | Ligninases | Peroxidase            | 36.1 | 1.63 | McClagherty and Linkins, 1990 <sup>9</sup>  |
| 65 | Ligninases | Peroxidase            | 52.0 | 2.02 | McClagherty and Linkins, 1990 <sup>9</sup>  |
| 66 | Ligninases | Peroxidase            | 30.5 | 1.51 | McClagherty and Linkins, 1990 <sup>9</sup>  |
| 67 | Ligninases | Peroxidase            | 51.2 | 2.00 | McClagherty and Linkins, 1990 <sup>9</sup>  |
| 68 | Ligninases | Phenol oxidase        | 54.8 | 2.10 | Niemetz and Gross, 2003 <sup>41</sup>       |
| 69 | Ligninases | Phenol oxidase        | 57.0 | 2.16 | Aktas et al., 2001 <sup>42</sup>            |
| 70 | Ligninases | Phenol oxidase        | 55.0 | 2.11 | Di Nardo et al., 2004 <sup>37</sup>         |
| 71 | Ligninases | Phenol oxidase        | 44   | 1.81 | McClagherty and Linkins, 1990 <sup>9</sup>  |
| 72 | Ligninases | Phenol oxidase        | 56.9 | 2.16 | McClagherty and Linkins, 1990 <sup>43</sup> |

|    |            |                             |      |      |                                             |
|----|------------|-----------------------------|------|------|---------------------------------------------|
| 73 | Ligninases | Phenol oxidase              | 37.2 | 1.65 | McClagherty and Linkins, 1990 <sup>43</sup> |
| 74 | Ligninases | Phenol oxidase              | 56.6 | 2.15 | McClagherty and Linkins, 1990 <sup>43</sup> |
| 75 | Ligninases | Phenol oxidase              | 76.3 | 2.81 | McClagherty and Linkins, 1990 <sup>43</sup> |
| 76 | Ligninases | Phenol oxidase              | 52.9 | 2.05 | McClagherty and Linkins, 1990 <sup>43</sup> |
| 77 | Ligninases | Phenol oxidase              | 57   | 2.16 | McClagherty and Linkins, 1990 <sup>43</sup> |
| 78 | Ligninases | Phenol oxidase              | 42.2 | 1.77 | Sutay Kocabas et al., 2008 <sup>44</sup>    |
| 89 | Ligninases | Phenol oxidase              | 42.3 | 1.77 | Kocabas et al. 2008 <sup>44</sup>           |
| 90 | Ligninases | Phenol oxidase              | 44.8 | 1.83 | Zhang et al. 2008 <sup>45</sup>             |
| 91 | Ligninases | Phenol oxidase              | 22.3 | 1.35 | Valtcheva et al. 2003 <sup>46</sup>         |
| 92 | Ligninases | Phenol oxidase              | 12.4 | 1.18 | Lo et al. 2001 <sup>47</sup>                |
| 93 | Ligninases | Manganese Peroxidaseoxidase | 51.9 | 2.02 | Acevedo et al. 2010 <sup>48</sup>           |
| 94 | Ligninases | Manganese Peroxidaseoxidase | 34.4 | 1.59 | Acevedo et al. 2010 <sup>48</sup>           |
| 95 | Ligninases | Phenol oxidase              | 32.5 | 1.55 | Davidson et al. 2012 <sup>35</sup>          |
| 96 | Ligninases | Phenol oxidase              | 23   | 1.37 | Annur et al. 2009 <sup>49</sup>             |

\*  $Q_{10}$  values are calculated from  $E_a$  with a temperature increase from 20 °C to 30 °C.

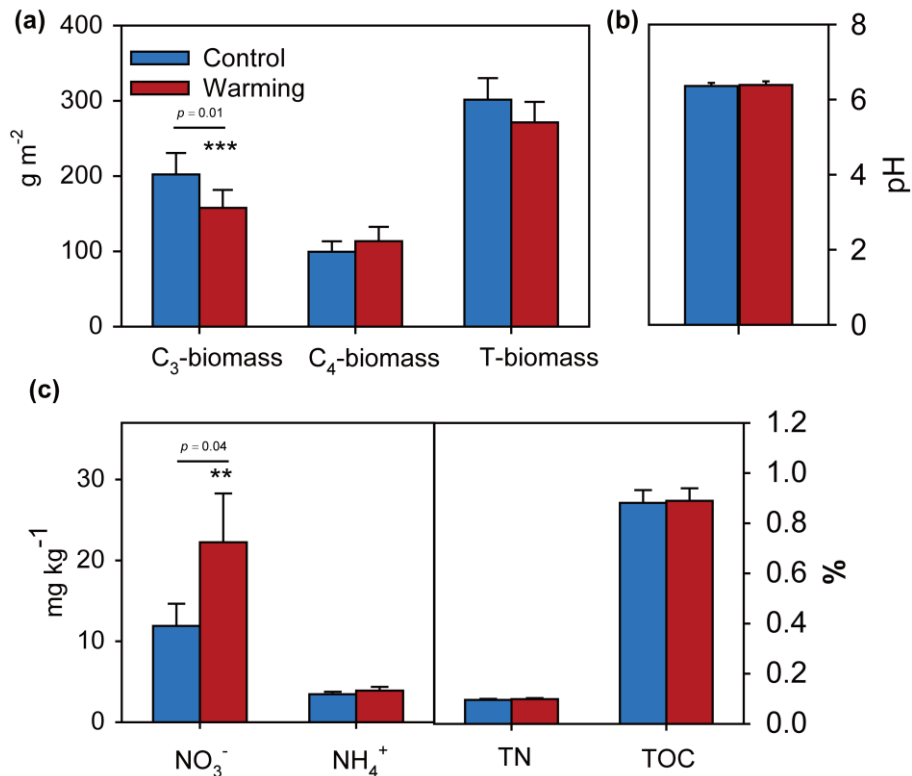

**Supplementary Figure 1. Warming effects on plant and soil variables.** (a) Effects of warming on aboveground plant biomass from C<sub>3</sub>, C<sub>4</sub> and total species; (b) Soil pH; (c) Soil nitrate (NO<sub>3</sub><sup>-</sup>), ammonia (NH<sub>4</sub><sup>+</sup>), total N (TN) and total organic carbon (TOC) across 7 years. Error bars represent standard error of the mean ( $n = 4$  field plots examined 7 repeated measures from 2010 to 2016). The differences between warming and the control were tested by the two-sided repeated-measures ANOVA, indicated by \*\*\* when  $p < 0.01$ , \*\* when  $p < 0.05$ . Source data are provided as a Source Data file.



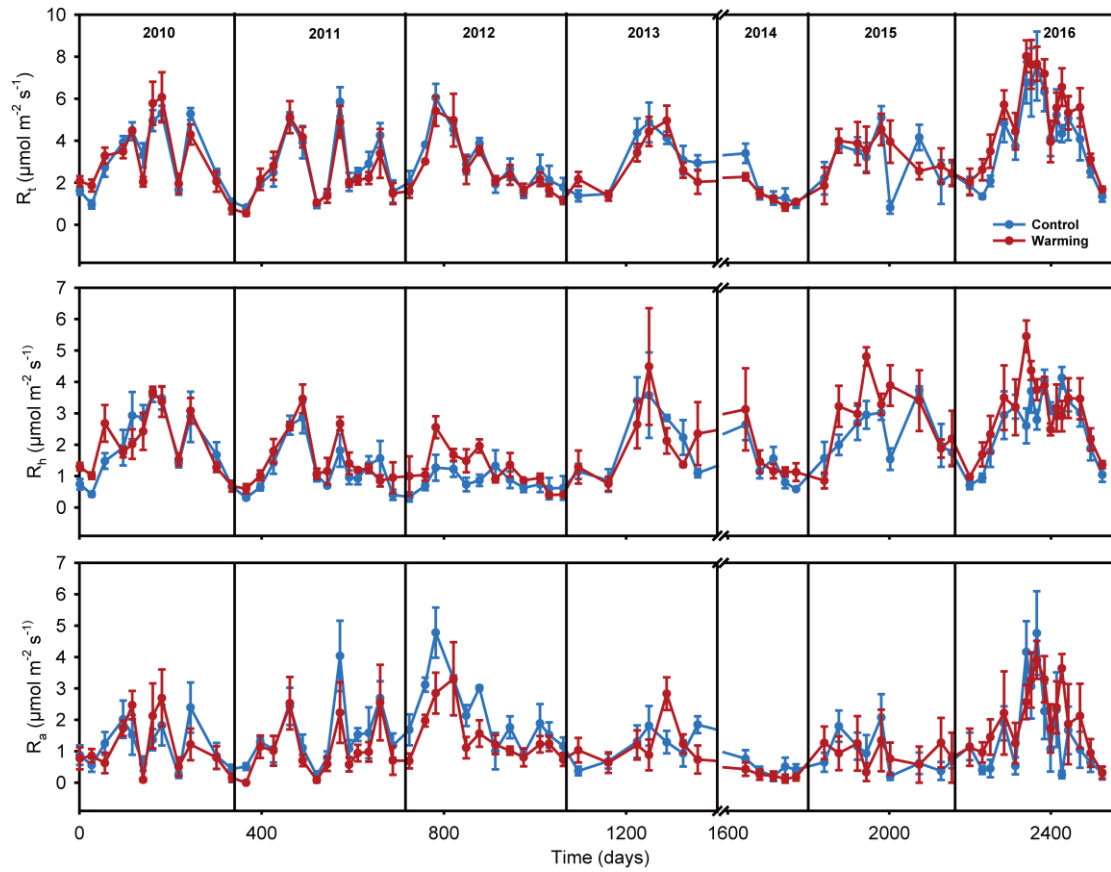

**Supplementary Figure 2. Temporal change of soil respiration ( $R_t$ ), heterotrophic respiration ( $R_h$ ) and autotrophic respiration ( $R_a$ ) from 2010 to 2016. The respiration values were displayed as mean  $\pm$  standard error ( $n = 4$  biological field plots).**

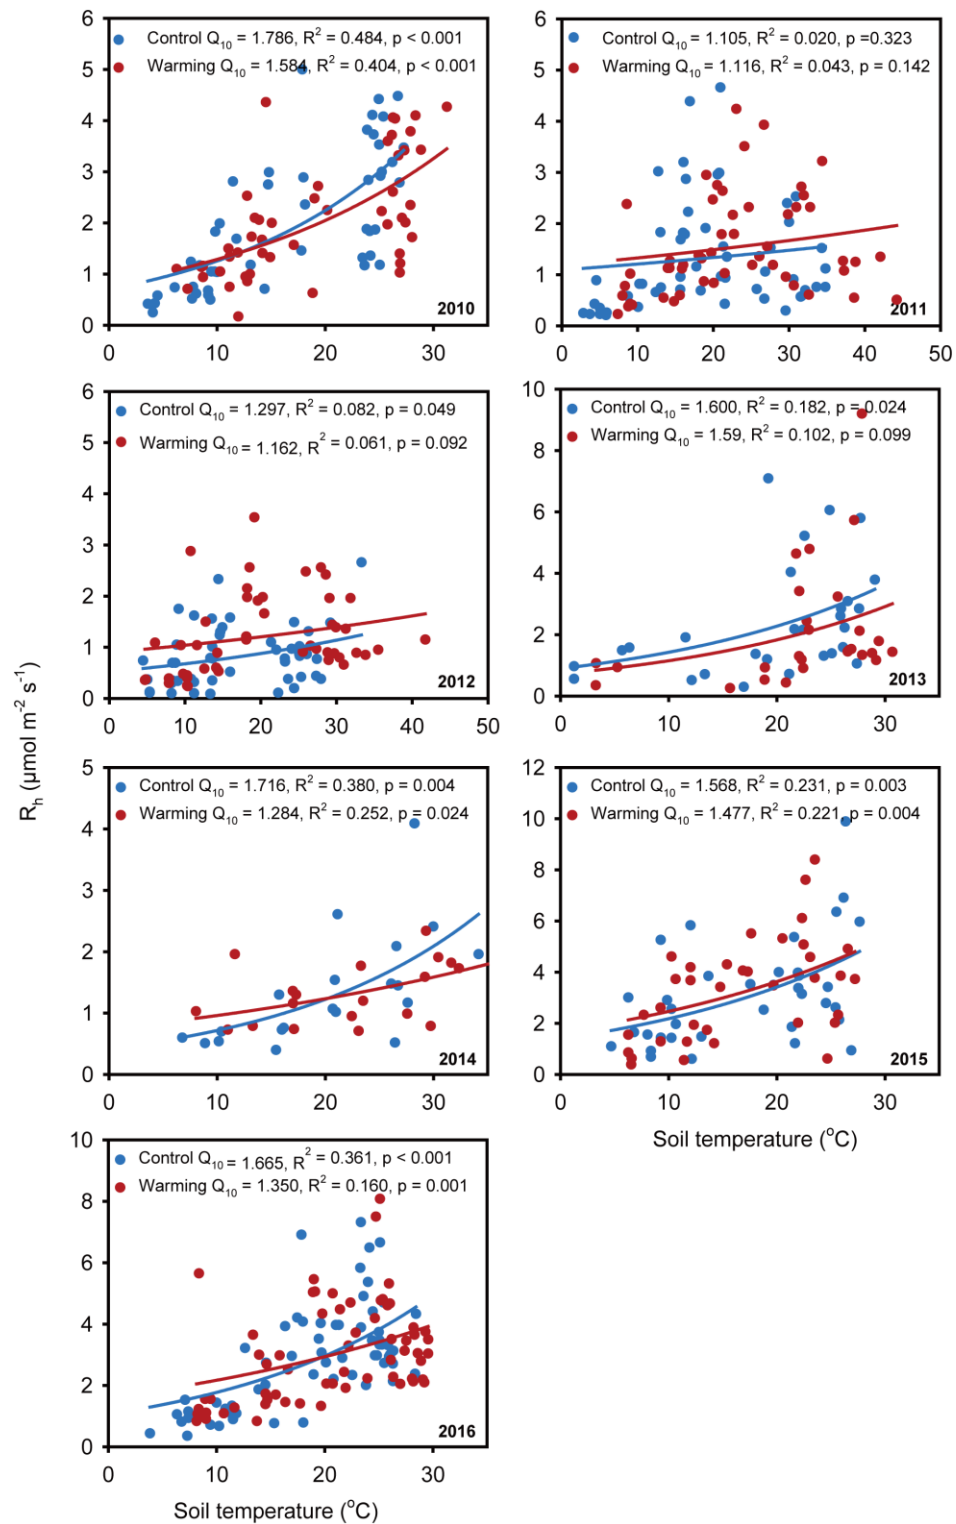

**Supplementary Figure 3. Apparent temperature sensitivity of soil heterotrophic respiration ( $Q_{10}$ ).** The curve fitting method was used for the control and warming treatments in each year (2010–2016) by exponential growth regression model. Significance was test by analysis of variance (ANOVA).

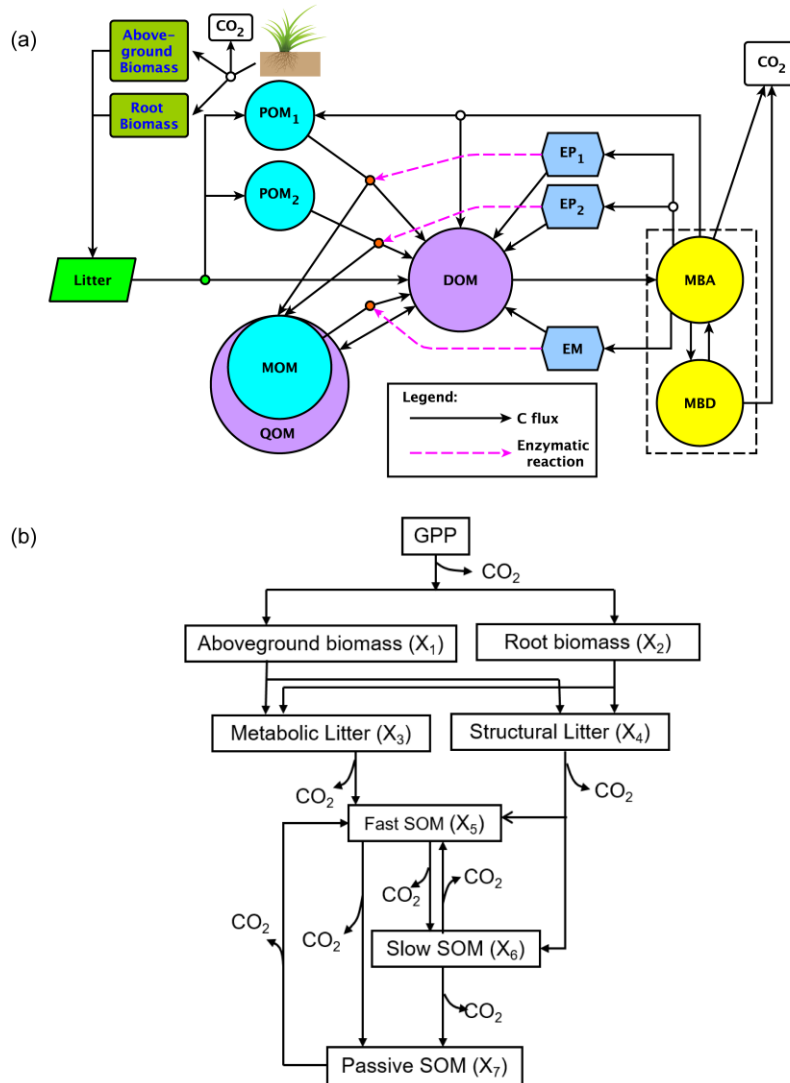

**Supplementary Figure 4. Flowcharts of ecosystem models. (a)** Microbial-ENzyme Decomposition (MEND) model. Soil organic matter (SOM) pools include: particulate organic matter (POM) (e.g., POM decomposed by oxidative and hydrolytic enzymes, denoted by  $P_1$  and  $P_2$  in the governing equations, respectively), mineral-associated organic matter (MOM, denoted by  $M$ ), dissolved organic matter (DOM,  $D$ ), adsorbed phase of DOM (QOM,  $Q$ ), active and dormant microbes (MBA and MBD, denoted by BA & BD), POM-degraded enzymes (e.g.,  $EP_1$  and  $EP_2$  that break down  $P_1$  and  $P_2$ , respectively), and MOM-degraded enzymes (EM). **(b)** Terrestrial Ecosystem (TECO) model.

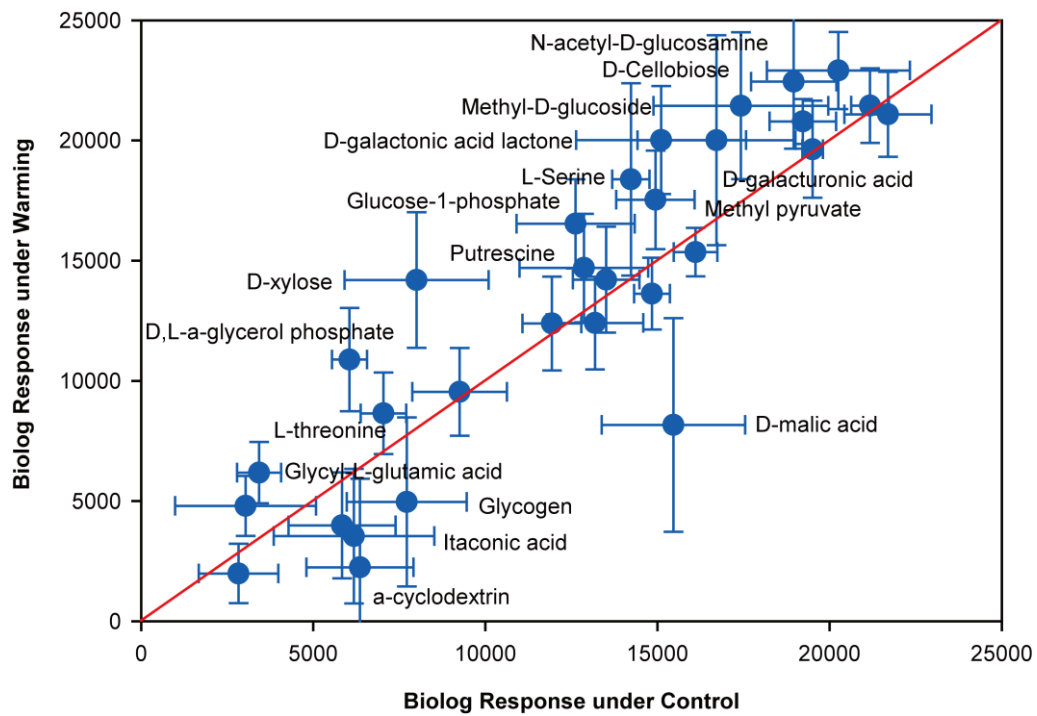

**Supplementary Figure 5. A scatterplot of BIOLOG metabolic profiles under warming and control in 2016.** Values close to the reference line (red) are in good agreement with the control values. Bi-directional error bars represent standard errors of the mean under control and warming treatments. Values above the reference line have an enhanced ability to utilize that carbon source in the warmed plots, value below have an inhibited ability in the warmed plots.

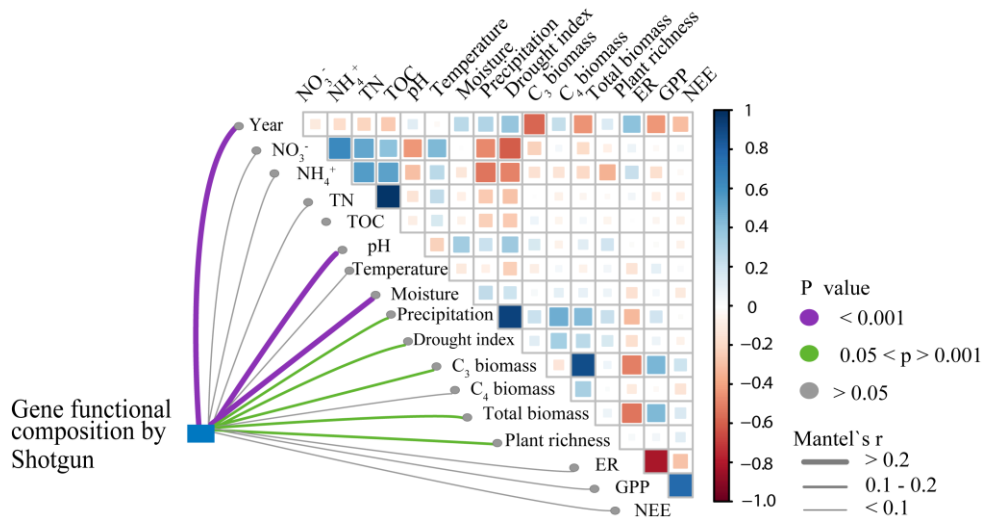

**Supplementary Figure 6. Pairwise comparisons of environmental factors with functional community structure based on shotgun sequencing data.** The shotgun sequencing data were annotated using EcoFUN-MAP database. A color gradient denotes Pearson's correlation coefficients with functional community structure by partial Mantel tests. Edge width corresponds to the Mantel's  $r$  statistic for the corresponding distance correlations, and edge color denotes the statistical significance.

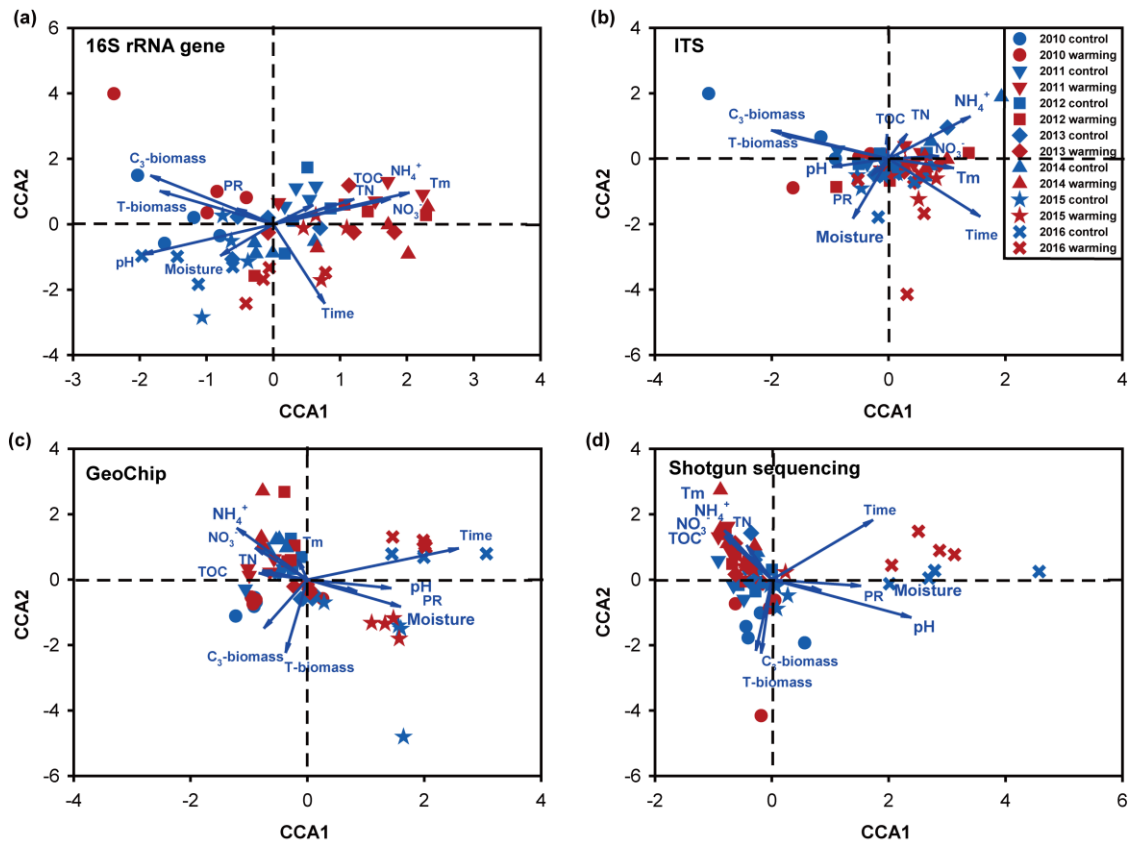

**Supplementary Figure 7. Canonical correspondence analyses (CCA) of microbial communities.** (a) Bacterial community based on 16S rRNA gene; (b) Fungal community based on ITS; (c) Functional community based on GeoChip; and (d) Functional community based on shotgun metagenomic sequences with EcoFUN-MAP. Phylogenetic and functional structures of microbial communities were significantly shaped by soil related factors: soil temperature (Tm), moisture, soil pH, soil total organic carbon (TOC), total nitrogen (TN), soil nitrate ( $\text{NO}_3^-$ ) and ammonia ( $\text{NH}_4^+$ ) contents; by plant related factors:  $\text{C}_3$  and total aboveground plant biomass, and plant richness (PR); and by time.

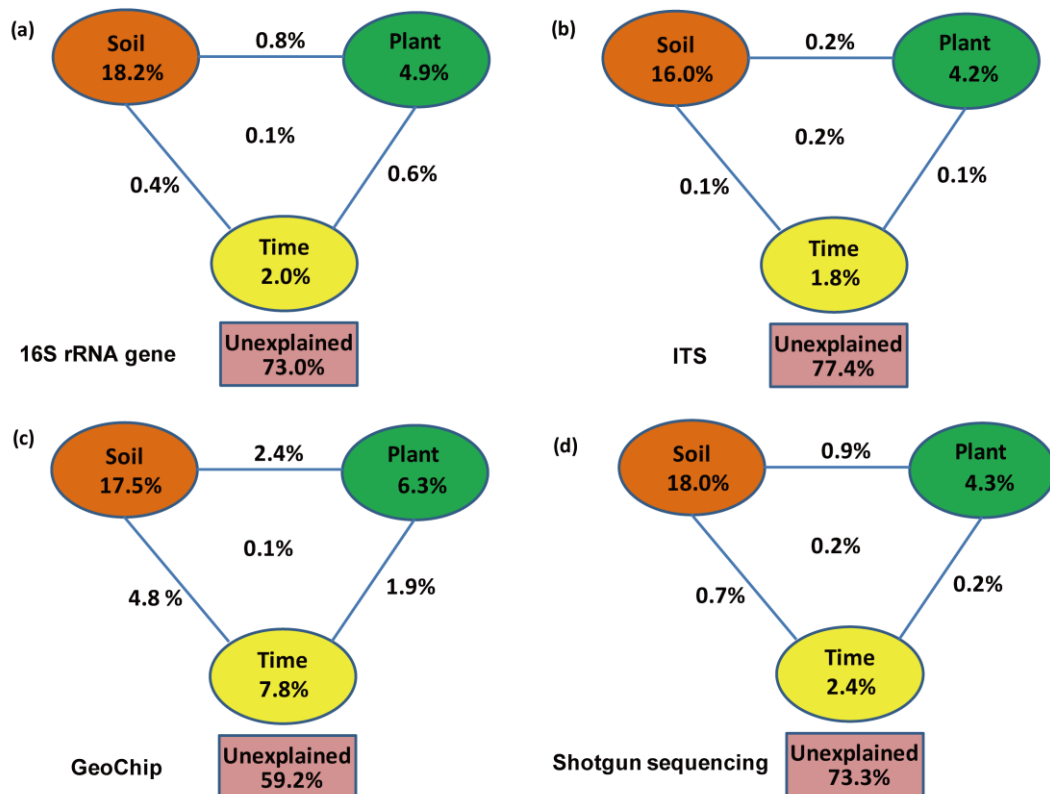

**Supplementary Figure 8. CCA-based variation partitioning analysis (VPA) of microbial communities.** (a) Bacterial community based on 16S rRNA gene; (b) Fungal community based on ITS; (c) Functional community based on GeoChip; and (d) Functional community based on shotgun metagenomic sequences based on EcoFUN-MAP. The relative proportions of bacterial community variations that can be explained by different types of environmental factors including soil related factors: soil temperature ( $T_m$ ), moisture, soil pH, soil total organic carbon (TOC), total nitrogen (TN), soil nitrate ( $\text{NO}_3^-$ ) and ammonia ( $\text{NH}_4^+$ ) contents; plant related factors:  $\text{C}_3$  and total aboveground plant biomass, and plant richness (PR); and time. The unexplained variations are either due to unmeasured environmental variables and/or stochastic factors.

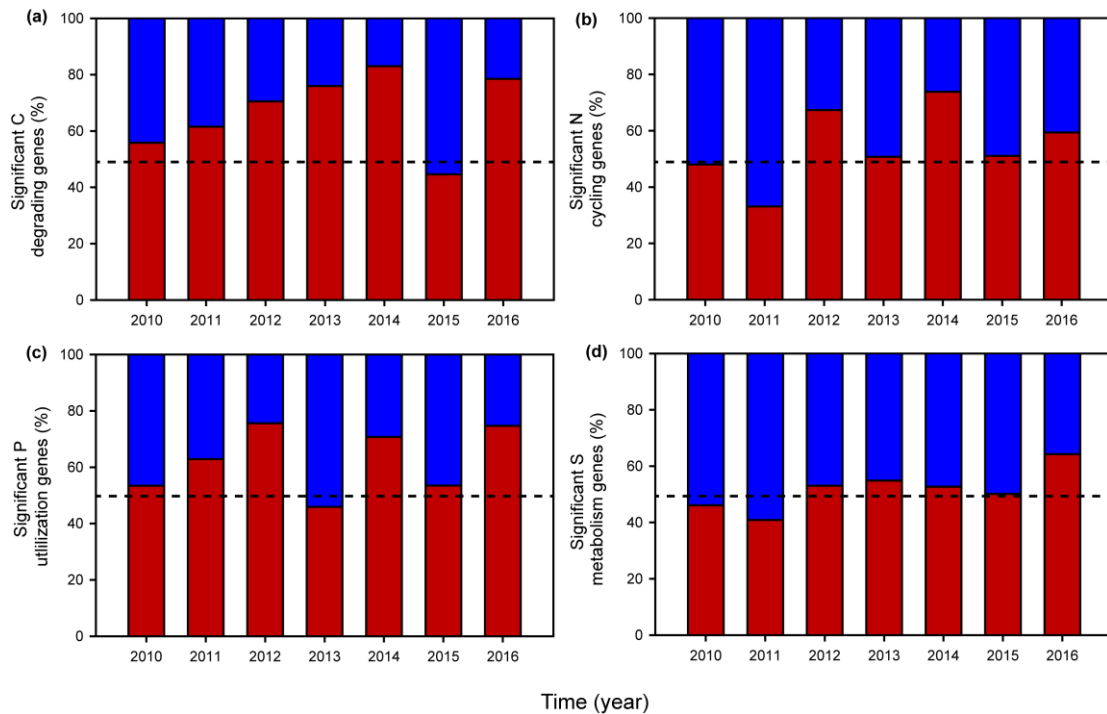

**Supplementary Figure 9. Significantly changed genes involved in C degradation (a), N cycling (b), P utilization (c) and S metabolism (d) by warming according to GeoChip data.** Significance is based on response ratio of each gene with 95% confidence intervals of abundance differences between warmed and control treatments. Dash line represents that the abundance of warming-stimulated (red) genes are in good agreement with the abundance of warming-inhibited (blue) genes. The genes involved in C degradation, N cycling, P utilization and S metabolism in this plot are listed in Supplementary Table 4.



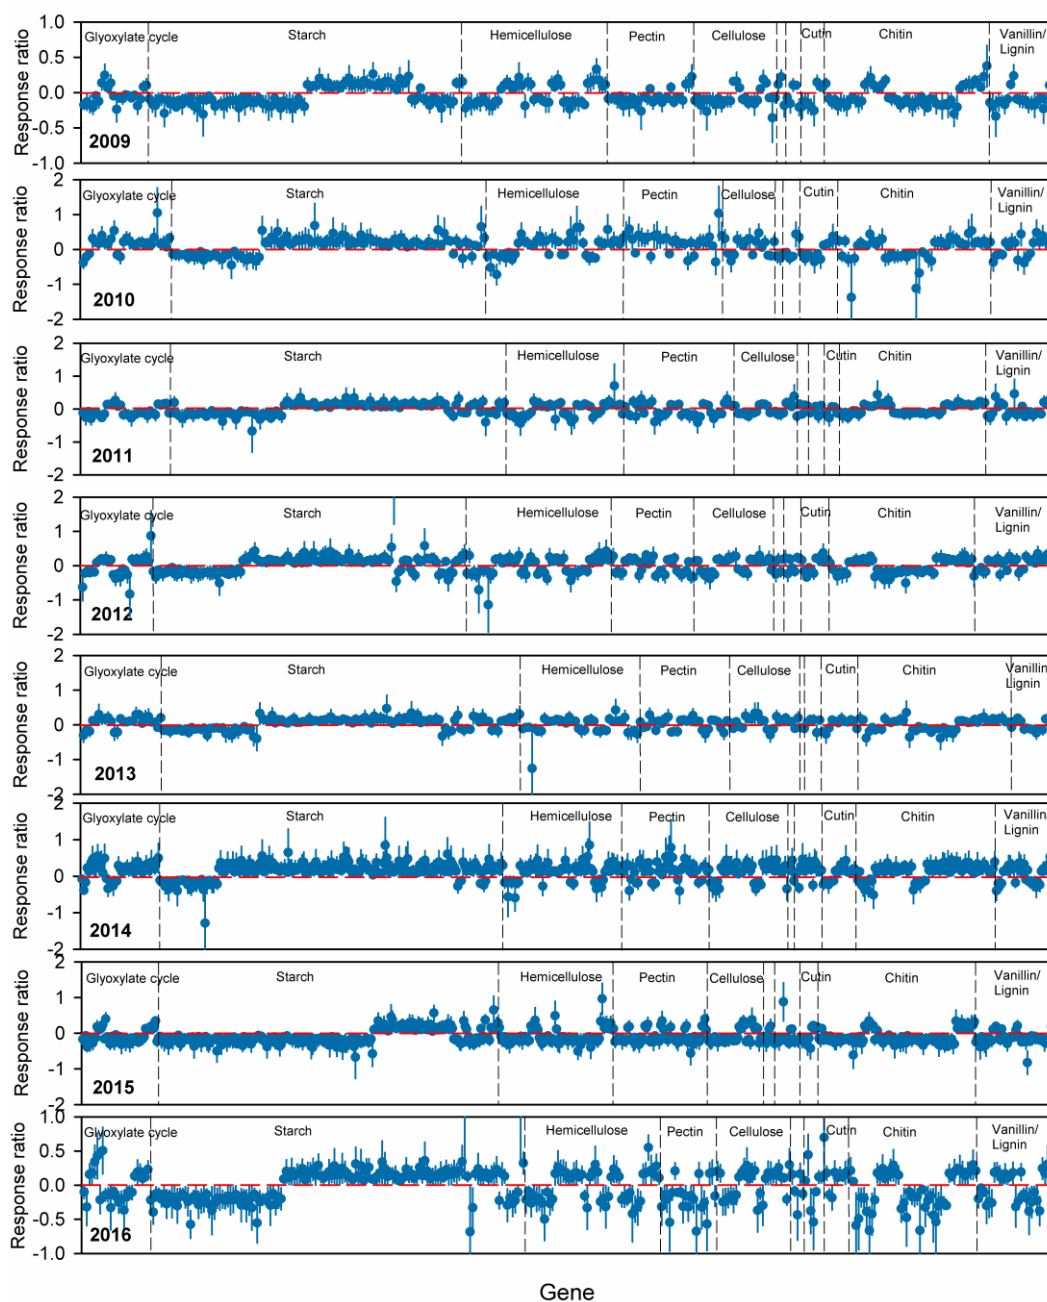

**Supplementary Figure 10. Response ratios showing significant changes in abundance of C degradation genes in each year detected by GeoChip.** Warming-stimulated C degrading genes were more than warming- inhibited genes in most years. Error bars represented 95% confidence intervals of abundance differences between warmed and control treatments. The targeted substrates were arranged in order from labile to recalcitrant C. The full names of the genes in this figure are listed in Supplementary Table 4.

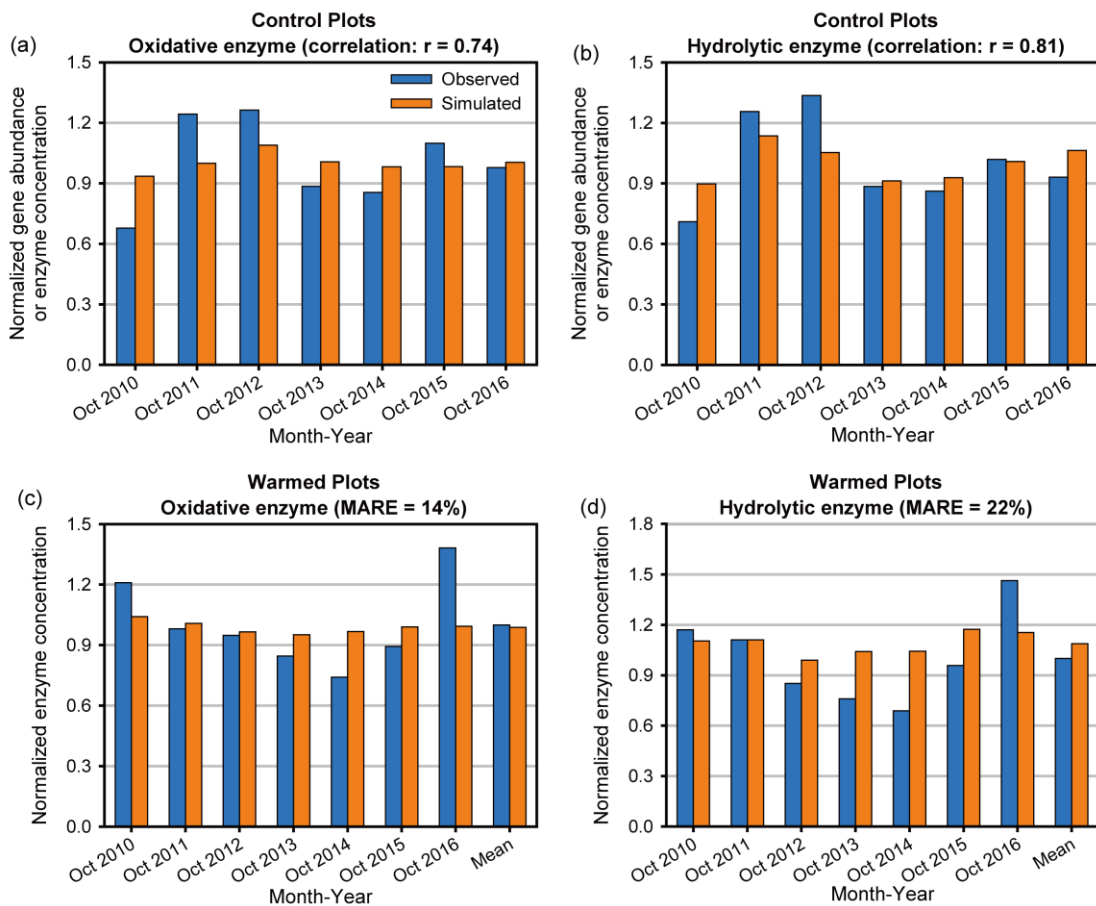

**Supplementary Figure 11. MEND modeling performance with gene abundance data.** MEND-simulated enzyme concentrations vs. GeoChip gene abundances for (a) oxidative enzymes and (b) hydrolytic enzymes in the control plot. MEND-simulated enzyme concentrations vs. GeoChip-informed enzyme concentrations for (c) oxidative enzymes and (d) hydrolytic enzymes in the warmed plot. The model performance for the control plot is quantified by the correlation coefficient ( $r$ ), as we cannot directly compare the absolute values between GeoChip gene abundances and MEND enzyme concentrations. The model performance for the simulations under warming is evaluated by the Mean Absolute Relative Error (MARE) (see Table S9). Lower MARE value means better performance. All data are normalized by their respective mean values.

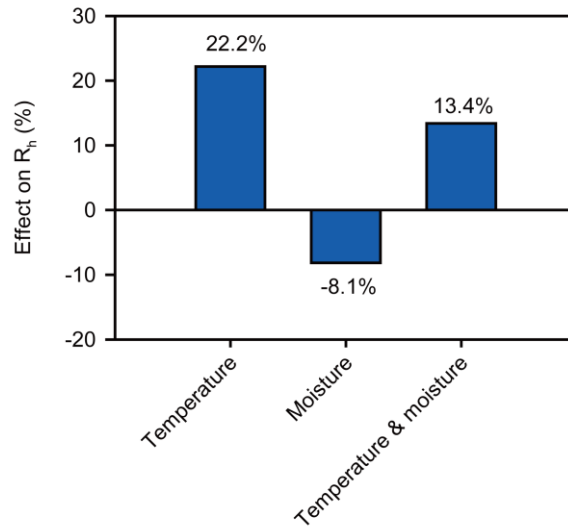

**Supplementary Figure 12 The impact of changing temperature vs. changing moisture on soil  $R_h$  estimated by the gMEND model.** The negative effect on  $R_h$  due to slightly drier soil under warming treatment was considerable, but it was completely shifted by the significant positive effect by increasing soil temperature.

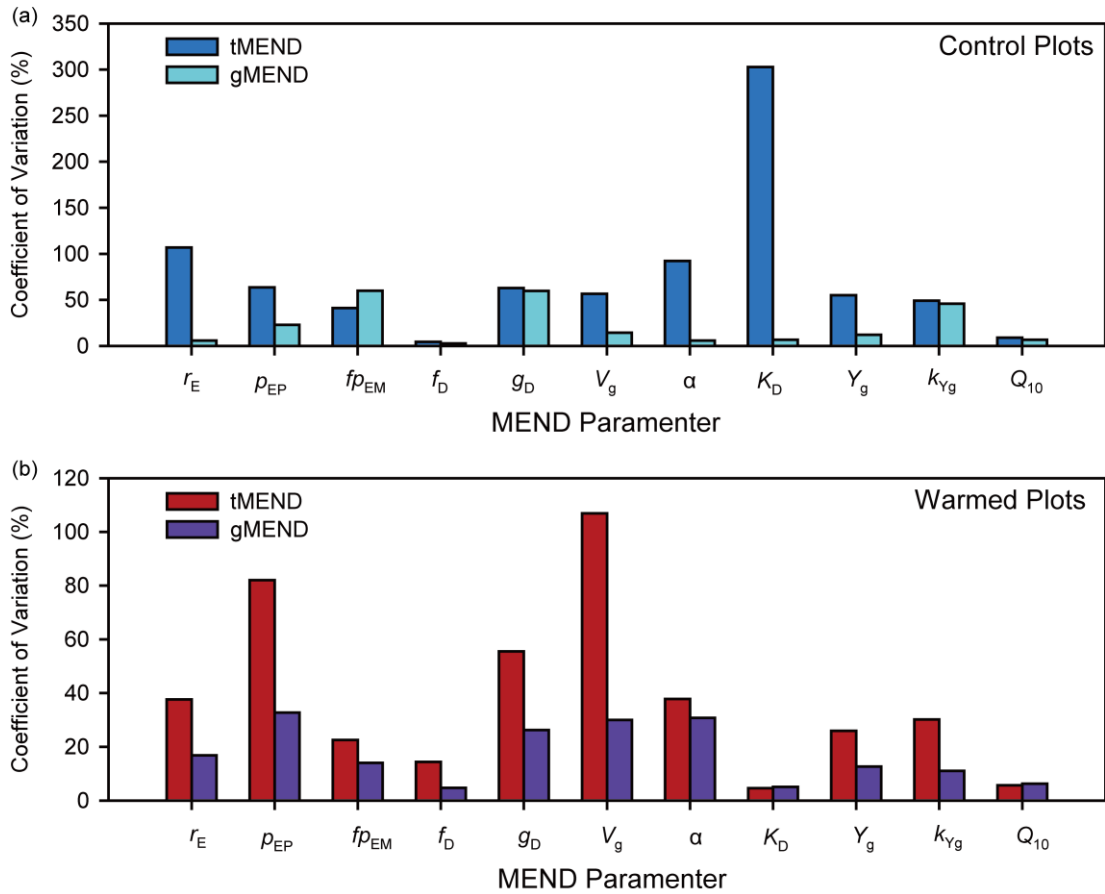

**Supplementary Figure 13. The MEND model parameter uncertainty was quantified by the Coefficient of Variation (CV) in the (a) Control and (b) Warmed plot.** The tMEND refers to the traditional MEND model parameterization without gene abundances data. The gMEND denotes the improved MEND parameterization with gene abundances. The 11 model parameters are  $r_E$ : enzyme turnover rate;  $p_{EP}$  and  $fp_{EM}$ : two coefficients controlling enzyme production rates;  $f_D$ : fraction of decomposed particulate organic matter (POM) entering dissolved organic matter (DOM) pool;  $g_D$ : fraction of dead microbe entering DOM pool;  $V_g$ : maximum specific growth rate for microbe;  $\alpha$ : a coefficient relating specific microbial maintenance rate ( $V_m$ ) to growth rate ( $\alpha = V_m / (V_g + V_m)$ );  $K_D$ : half-saturation constant for microbial uptake of DOM;  $Y_g$ : carbon use efficiency at reference temperature;  $k_{Yg}$ : temperature sensitivity of  $Y_g$ ;  $Q_{10}$ : temperature sensitivity of enzyme-catalyzed soil organic matter decomposition. See Table S9 for detailed description of all model parameters.

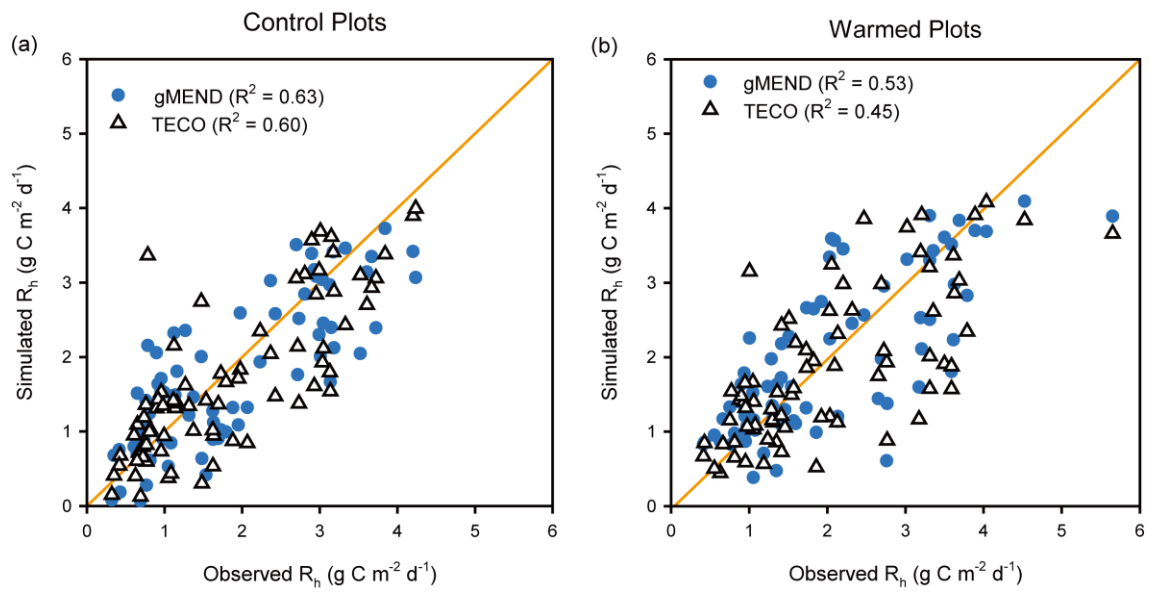

**Supplementary Figure 14. Improvement of model performance with gMEND compared to the non-microbial model TECO. (a) Control plots. (b) Warmed plots.**

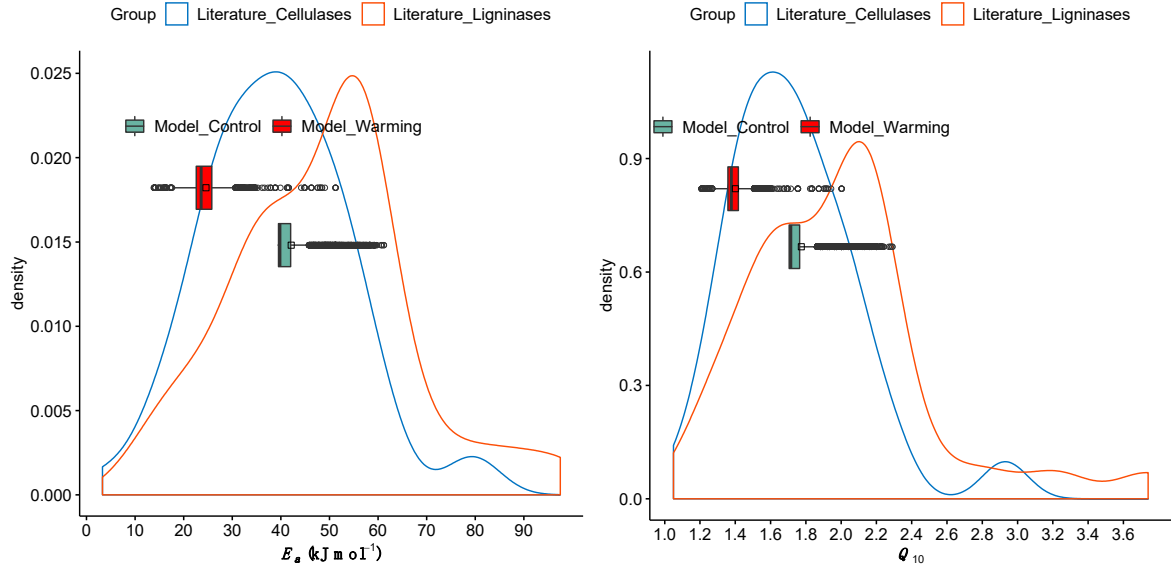

**Supplementary Figure 15 Activation energy ( $E_a$ ) and corresponding  $Q_{10}$  values from literature and our model estimates.** Literature- $E_a$  values are pooled data from major ligninases and cellulases catalyzing the decomposition of soil organic carbon. Literature- $Q_{10}$  values ( $n = 63$  and 33 for cellulases and ligninases, respectively) are calculated from  $E_a$  with a temperature increase from 20 °C to 30 °C. Model-derived  $Q_{10}$  values are those under control ( $n = 7,560$ ) and warming (+3°C,  $n = 2,095$ ) treatments. Model- $E_a$  values are calculated from  $Q_{10}$  with a temperature increase from 20 °C to 30 °C. Boxplots depict median, first and third quartiles, and full ranges (bounded at  $1.5 \times$  interquartile range).

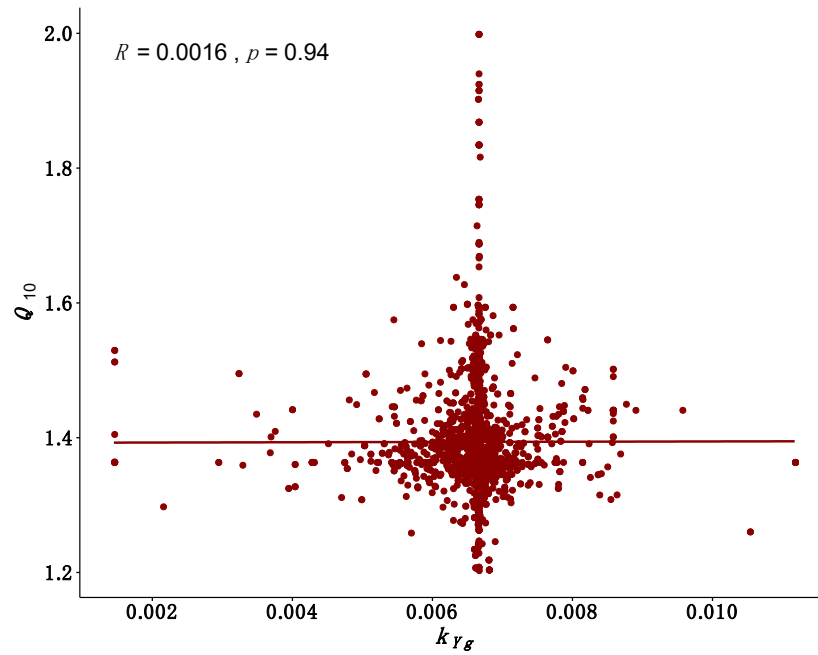

**Supplementary Figure 16 Correlation between  $Q_{10}$  and  $k_{Y_g}$  (temperature sensitivity of  $Y_g$ ).**  $Y_g$  is the true growth yield, i.e., a proxy for carbon use efficiency (CUE) in the MEND model. The temperature dependence of  $Y_g$  on soil temperature ( $T$ ) is described by  $Y_g(T) = Y_g(T_{\text{ref}}) - k_{Y_g} \cdot (T - T_{\text{ref}})$ , where  $Y_g(T)$  and  $Y_g(T_{\text{ref}})$  are the  $Y_g$  at soil temperature  $T$  and  $T_{\text{ref}}$  (reference temperature), respectively; and  $k_{Y_g}$  denote the temperature sensitivity of  $Y_g$ .

## Supplementary References

- 1 Eivazi, F. & Tabatabai, M. A. Glucosidases and galactosidases in soils. *Soil Biology & Biochemistry* **20**, 601-606 (1988).
- 2 Deng, S. P. & Tabatabai, M. A. Cellulase activity of soils. *Soil Biology & Biochemistry* **26**, 1347-1354 (1994).
- 3 Chauve, M. *et al.* Comparative kinetic analysis of two fungal  $\beta$ -glucosidases. *Biotechnology for Biofuels* **3**, 3 (2010).
- 4 Vila-Real, H., Alfaia, A. J., Phillips, R. S., Calado, A. R. & Ribeiro, M. H. L. Pressure-enhanced activity and stability of  $\alpha$ -L-rhamnosidase and  $\beta$ -D-glucosidase activities expressed by naringinase. *Journal of Molecular Catalysis B: Enzymatic* **65**, 102-109 (2010).
- 5 Han, Y. & Srinivasan, V. Purification and characterization of  $\beta$ -Glucosidase of *Alcaligenes faecalis*. *Journal of bacteriology* **100**, 1355-1363 (1969).
- 6 Plant, A. R., Oliver, J. E., Patchett, M. L., Daniel, R. M. & Morgan, H. W. Stability and substrate specificity of a  $\beta$ -glucosidase from the thermophilic bacterium Tp8 cloned into *Escherichia coli*. *Archives of Biochemistry and Biophysics* **262**, 181-188 (1988).
- 7 Patchett, M. L., Daniel, R. M. & Morgan, H. W. Purification and properties of a stable  $\beta$ -glucosidase from an extremely thermophilic anaerobic bacterium. *Biochem. J.* **243**, 779-770 (1987).
- 8 Ait, N., Creuzet, N. & Cattaneo, J. Properties of  $\beta$ -glucosidase purified from *Clostridium thermocellum*. *Journal of General Microbiology* **128**, 569-577 (1982).
- 9 McLaugherty, C. & Linkins, A. Temperature responses of enzymes in two forest soils. *Soil Biology and Biochemistry* **22**, 29-33 (1990).
- 10 Rajoka, M. I., Latif, F., Khan, S. & Shahid, R. Kinetics of improved productivity of  $\beta$ -galactosidase by a cycloheximide-resistant mutant of *Kluyveromyces marxianus*. *Biotechnology Letters* **26**, 741-746 (2004).
- 11 Yague, E. & Estevez, M. P. Purification and characterization of a glucosidase from *Evernia prunastri*. *European Journal of Biochemistry* **175**, 627-632 (1988).
- 12 Rajoka, M. I., Akhtar, M. W., Hanif, A. & Khalid, A. Production and characterization of a highly active cellobiase from *Aspergillus niger* grown in solid state fermentation. *World Journal of Microbiology and Biotechnology* **22**, 991-998 (2006).
- 13 Calsavara, L. P. V., De Moraes, F. F. & Zanin, G. M. Comparison of catalytic properties of free and immobilized cellobiase Novozym 188. *Applied Biochemistry and Biotechnology* **91**, 615-626 (2001).
- 14 Li, Y. T. & Shetlar, M. R. GLYCOSIDASES IN THE EARTHWORM, LUMBRICUS TERRESTRIS. *Comparative Biochemistry & Physiology* **14**, 275,IN273,279-278,IN276,279 (1965).
- 15 Maguire, R. J. Kinetics of hydrolysis of cellulose by  $\beta$ -1,4-glucan cellobiohydrolase of *Trichoderma viride*. *Canadian Journal of Biochemistry* **55**, 644-650 (1977).
- 16 Saharay, M., Guo, H.-B., Smith, J. C. & Guo, H. in *Computational Modeling in Lignocellulosic Biofuel Production* Vol. 1052 ACS Symposium Series Ch. 7, 135-154 (American Chemical Society, 2010).
- 17 Rouau, X. & Odier, E. Production of extracellular enzyme by the white-rot fungus *Dichomitus squalens* in cellulose-containing liquid culture. *Enzyme & Microbial Technology* **8**, 22-26 (1986).
- 18 Nikolova, P. V., Creagh, A. L., Duff, S. J. B. & Haynes, C. A. Thermostability and irreversible activity loss of exoglucanase/xylanase Cex from *Cellulomonas fimi*. *Biochemistry* **36**, 1381-1388 (1997).
- 19 Banka, D. & Crossley, D. Noise levels of superconducting gravimeters at seismic frequencies. *Geophysical Journal International* **139**, 87-97 (1999).
- 20 Eriksen, J. & Goksoyr, J. Cellulases from *Chaetomium thermophile* var. *dissitum*. *Eur J Biochem* **77**, 445-450 (1977).
- 21 Onyike, E., Auta, R. & Nok, A. Isolation, partial purification and characterization of endoglucanase (EC. 3.2. 1.4) from *Aspergillus niger* SL 1 using corn cobs as carbon source. *Nigerian Journal of Biochemistry and Molecular Biology* **23**, 1-11 (2008).



- 22 Pétré, D. *et al.* Purification and properties of the endoglucanase C of *Clostridium thermocellum* produced in *Escherichia coli*. *Biochimie* **68**, 687-695 (1986).
- 23 Warner, C. D. *et al.* Tertiary structure and characterization of a glycoside hydrolase family 44 endoglucanase from *Clostridium acetobutylicum*. *Applied and Environmental Microbiology* **76**, 338-346 (2010).
- 24 Javed, M., Rashid, M., Nadeem, H., Riaz, M. & Perveen, R. Catalytic and thermodynamic characterization of Endoglucanase (CMCase) from *Aspergillus oryzae* cmc-1. *Applied Biochemistry and Biotechnology* **157**, 483-497 (2009).
- 25 Saqib, A. A. N., Hassan, M., Khan, N. F. & Baig, S. Thermostability of crude endoglucanase from *Aspergillus fumigatus* grown under solid state fermentation (SSF) and submerged fermentation (SmF). *Process Biochemistry* **45**, 641-646 (2010).
- 26 Jabbar, A., Rashid, M. H., Javed, M. R., Perveen, R. & Malana, M. A. Kinetics and thermodynamics of a novel endoglucanase (CMCase) from *Gymnoascus citrina* produced under solid-state condition. *Journal of Industrial Microbiology and Biotechnology* **35**, 515-524 (2008).
- 27 Pérez-Avalos, O., Sánchez-Herrera, L. M., Salgado, L. M. & Ponce-Noyola, T. A bifunctional endoglucanase/endoxylanase from *Cellulomonas flavigena* with potential use in industrial processes at different pH. *Current Microbiology* **57**, 39-44 (2008).
- 28 Siddiqui, K. S., Saqib, A. A. N., Rashid, M. H. & Rajoka, M. I. Carboxyl group modification significantly altered the kinetic properties of purified carboxymethylcellulase from *Aspergillus niger*. *Enzyme and Microbial Technology* **27**, 467-474 (2000).
- 29 Mel'Nik, M. S., Gerner, M. L. & Rabinovich, M. L. A low-molecular-weight endoglucanase from *Clostridium thermocellum* similar to endoglucanase C. The specificity of effects on synthetic substrates and the amino acid composition. *Прикладная биохимия и микробиология* **35**, 616-623 (1999).
- 30 Hong, S.-W., Hah, Y.-C., Maeng, P.-J. & Jeong, C.-S. Purification and mode of action of low molecular weight  $\beta$ -1,4-glucan glucanohydrolase from *Trichoderma koningii*. *Enzyme and Microbial Technology* **8**, 227-235 (1986).
- 31 Paljevac, M., Primožič, M., Habulin, M., Novak, Z. & Knez, Ž. Hydrolysis of carboxymethyl cellulose catalyzed by cellulase immobilized on silica gels at low and high pressures. *The Journal of Supercritical Fluids* **43**, 74-80 (2007).
- 32 Trasar-Cepeda, C., Gil-Sotres, F. & Leirós, M. C. Thermodynamic parameters of enzymes in grassland soils from Galicia, NW Spain. *Soil Biology and Biochemistry* **39**, 311-319 (2007).
- 33 Stone, M. M. *et al.* Temperature sensitivity of soil enzyme kinetics under N-fertilization in two temperate forests. *Global Change Biology* **18**, 1173-1184 (2012).
- 34 Salkinojalonen, M. S. Microbial activity of boreal forest soil in a cold climate. *Boreal Environment Research* **6**, 19-28 (2001).
- 35 Davidson, E. A., Samanta, S., Caramori, S. S. & Savage, K. The Dual Arrhenius and Michaelis–Menten kinetics model for decomposition of soil organic matter at hourly to seasonal time scales. *Global Change Biology* **18**, 371-384 (2012).
- 36 Chisari, M., Barbagallo, R. N. & Spagna, G. Characterization of Polyphenol Oxidase and Peroxidase and Influence on Browning of Cold Stored Strawberry Fruit. *Journal of Agricultural and Food Chemistry* **55**, 3469-3476 (2007).
- 37 Di Nardo, C., Cinquegrana, A., Papa, S., Fuggi, A. & Fioretto, A. Laccase and peroxidase isoenzymes during leaf litter decomposition of *Quercus ilex* in a Mediterranean ecosystem. *Soil Biology and Biochemistry* **36**, 1539-1544 (2004).
- 38 Chisari, M., Barbagallo, R. N. & Spagna, G. Characterization and Role of Polyphenol Oxidase and Peroxidase in Browning of Fresh-Cut Melon. *Journal of Agricultural & Food Chemistry* **56**, 132-138 (2008).
- 39 Padiglia, A., Cruciani, E., Pazzaglia, G., Medda, R. & Floris, G. Purification and characterization of *Opuntia* peroxidase. *Phytochemistry* **38**, 295-297 (1995).

- 40 Floris, G., Medda, R. & Rinaldi, A. Peroxidase from Ipomoea batatas seedlings: Purification and properties. **23**, 1527-1529 (1984).
- 41 Niemetz, R. & Gross, G. G. Oxidation of pentagalloylglucose to the ellagitannin, tellimagrandin II, by a phenol oxidase from *Tellima grandiflora* leaves. *Phytochemistry* **62**, 301-306 (2003).
- 42 Aktas, N. *et al.* Reaction kinetics for laccase-catalyzed polymerization of 1-naphthol. *Bioresource Technology* **80**, 29-36 (2001).
- 43 Kersten, P. J., Kalyanaraman, B., Hammel, K. E., Reinhammar, B. & Kirk, T. K. Comparison of lignin peroxidase, horseradish peroxidase and laccase in the oxidation of methoxybenzenes. *Biochemical Journal* **268**, 475-480 (1990).
- 44 Kocabas, D. S., Bakir, U., Phillips, S. E. V., McPherson, M. J. & Ogel, Z. B. Purification, characterization, and identification of a novel bifunctional catalase-phenol oxidase from *Scytalidium thermophilum*. **79**, 407-415 (2008).
- 45 Zhang, J., Liu, X., Xu, Z., Chen, H. & Yang, Y. Degradation of chlorophenols catalyzed by laccase. *International Biodeterioration & Biodegradation* **61**, 351-356 (2008).
- 46 Valtcheva, E., Veleva, S., Radeva, G. & Valtchev, I. Enzyme action of the laccase-mediator system in the pulp delignification process. *Reaction Kinetics and Catalysis Letters* **78**, 183-191 (2003).
- 47 Lo, S., Ho, Y. & Buswell, J. Effect of phenolic monomers on the production of laccases by the edible mushroom *Pleurotus sajor-caju*, and partial characterization of a major laccase component. *Mycologia* **93**, 413-421 (2001).
- 48 Acevedo, F. *et al.* Degradation of polycyclic aromatic hydrocarbons by free and nanoclay-immobilized manganese peroxidase from *Anthracoophyllum discolor*. *Chemosphere* **80**, 271-278 (2010).
- 49 Annuar, M. S. M., Adnan, S., Vikineswary, S. & Chisti, Y. Kinetics and Energetics of Azo Dye Decolorization by *Pycnoporus sanguineus*. *Water, Air, and Soil Pollution* **202**, 179-188 (2009).
